# Supplementary material for: Mutational spectra of SARS-CoV-2 isolated from animals
Source: PeerJ. 2020 Dec 18;8:e10609. doi: 10.7717/peerj.10609 (PMC7751428; doi:10.7717/peerj.10609)
Supplement: Supplemental Information 1 [file peerj-08-10609-s001.xlsx]

## Sheet: Supplementary Table 1
No	Virus isolate	Accession number	Date of collection	Clade	Genome length(nt)	Host	Geographic area	%N
1	Wuhan-Hu-1	NC_045512.2	2019-12	L	29903	Human	China	0.00%
2	hCoV-19/cat/France/53/2020	EPI_ISL_437349	2020-04-17	G	29818	Cat	France	6.03%
3	hCoV-19/cat/Spain/IrsiCaixa-G5/2020	EPI_ISL_482820	2020-04-23	G	29541	Cat	Spain	45.87%
4	hCoV-19/cat/France/Env-Ba/2020	EPI_ISL_483063	2020-05-14	GR	29838	Cat	France	0.00%
5	hCoV-19/cat/France/Env-Di/2020	EPI_ISL_483064	2020-05-14	GR	29838	Cat	France	0.00%
6	hCoV-19/Felis catus/Belgium/BE-MG-0320/2020	EPI_ISL_487275	2020-03-11	G	29782	Cat	Belgium	0.00%
7	hCoV-19/cat/England/CVR-Cat2/2020	EPI_ISL_536400	2020-05-02	GR	29782	Cat	England	2.45%
8	hCoV-19/canine/Hong Kong/20-02756/2020	EPI_ISL_414518	2020-02-26	O	27871	Dog	Hong Kong	0.00%
9	hCoV-19/canine/Hong Kong/20-03695/2020	EPI_ISL_450403	2020-03-18	GR	29764	Dog	Hong Kong	0.00%
10	hCoV-19/mink/Netherlands/1/2020	EPI_ISL_431778	2020-04-24	G	29880	Mink	Netherlands	0.00%
11	hCoV-19/mink/Netherlands/NB01_01KS/2020	EPI_ISL_447623	2020-04-29	G	29746	Mink	Netherlands	0.00%
12	hCoV-19/mink/Netherlands/NB01_02KS/2020	EPI_ISL_447624	2020-04-29	G	29715	Mink	Netherlands	0.00%
13	hCoV-19/mink/Netherlands/NB01_03KS/2020	EPI_ISL_447625	2020-04-29	G	29878	Mink	Netherlands	0.00%
14	hCoV-19/mink/Netherlands/NB01_04KS/2020	EPI_ISL_447626	2020-04-29	G	29879	Mink	Netherlands	0.00%
15	hCoV-19/mink/Netherlands/NB03_index/2020	EPI_ISL_447633	2020-05-06	G	29890	Mink	Netherlands	0.00%
16	hCoV-19/mink/Netherlands/NB04_index/2020	EPI_ISL_447634	2020-05-06	G	29891	Mink	Netherlands	0.00%
17	hCoV-19/mink/Netherlands/NB-EMC-1-1/2020	EPI_ISL_522991	2020-04-28	G	29641	Mink	Netherlands	0.00%
18	hCoV-19/mink/Netherlands/NB-EMC-1-10/2020	EPI_ISL_522992	2020-04-28	G	29775	Mink	Netherlands	0.00%
19	hCoV-19/mink/Netherlands/NB-EMC-11-1/2020	EPI_ISL_522993	2020-06-07	G	29769	Mink	Netherlands	2.80%
20	hCoV-19/mink/Netherlands/NB-EMC-1-11/2020	EPI_ISL_522994	2020-04-28	G	29775	Mink	Netherlands	0.00%
21	hCoV-19/mink/Netherlands/NB-EMC-11-19/2020	EPI_ISL_522995	2020-06-07	G	29775	Mink	Netherlands	0.00%
22	hCoV-19/mink/Netherlands/NB-EMC-11-2/2020	EPI_ISL_522996	2020-06-07	G	29775	Mink	Netherlands	0.62%
23	hCoV-19/mink/Netherlands/NB-EMC-1-12/2020	EPI_ISL_522997	2020-04-28	G	29775	Mink	Netherlands	0.00%
24	hCoV-19/mink/Netherlands/NB-EMC-11-3/2020	EPI_ISL_522998	2020-06-07	G	29775	Mink	Netherlands	0.62%
25	hCoV-19/mink/Netherlands/NB-EMC-1-13/2020	EPI_ISL_522999	2020-04-28	G	29775	Mink	Netherlands	0.00%
26	hCoV-19/mink/Netherlands/NB-EMC-1-14/2020	EPI_ISL_523000	2020-04-28	G	29775	Mink	Netherlands	0.00%
27	hCoV-19/mink/Netherlands/NB-EMC-1-16/2020	EPI_ISL_523001	2020-04-28	G	29775	Mink	Netherlands	0.00%
28	hCoV-19/mink/Netherlands/NB-EMC-1-17/2020	EPI_ISL_523002	2020-04-28	G	29775	Mink	Netherlands	0.00%
29	hCoV-19/mink/Netherlands/NB-EMC-1-18/2020	EPI_ISL_523003	2020-04-28	G	29775	Mink	Netherlands	0.00%
30	hCoV-19/mink/Netherlands/NB-EMC-1-2/2020	EPI_ISL_523004	2020-04-28	G	29775	Mink	Netherlands	0.00%
31	hCoV-19/mink/Netherlands/NB-EMC-12-11/2020	EPI_ISL_523005	2020-06-07	G	29775	Mink	Netherlands	0.00%
32	hCoV-19/mink/Netherlands/NB-EMC-12-13/2020	EPI_ISL_523006	2020-06-07	G	29775	Mink	Netherlands	0.00%
33	hCoV-19/mink/Netherlands/NB-EMC-12-23/2020	EPI_ISL_523007	2020-06-07	G	29775	Mink	Netherlands	0.00%
34	hCoV-19/mink/Netherlands/NB-EMC-12-37/2020	EPI_ISL_523008	2020-06-07	G	29775	Mink	Netherlands	0.00%
35	hCoV-19/mink/Netherlands/NB-EMC-12-7/2020	EPI_ISL_523009	2020-06-07	G	29775	Mink	Netherlands	0.00%
36	hCoV-19/mink/Netherlands/NB-EMC-1-3/2020	EPI_ISL_523010	2020-04-28	G	29775	Mink	Netherlands	0.00%
37	hCoV-19/mink/Netherlands/NB-EMC-13-10/2020	EPI_ISL_523011	2020-06-14	G	29472	Mink	Netherlands	1.32%
38	hCoV-19/mink/Netherlands/NB-EMC-13-11/2020	EPI_ISL_523012	2020-06-14	G	29772	Mink	Netherlands	0.00%
39	hCoV-19/mink/Netherlands/NB-EMC-13-16/2020	EPI_ISL_523013	2020-06-14	G	29469	Mink	Netherlands	6.17%
40	hCoV-19/mink/Netherlands/NB-EMC-13-4/2020	EPI_ISL_523014	2020-06-14	G	29775	Mink	Netherlands	0.00%
41	hCoV-19/mink/Netherlands/NB-EMC-13-9/2020	EPI_ISL_523015	2020-06-14	G	29775	Mink	Netherlands	0.00%
42	hCoV-19/mink/Netherlands/NB-EMC-1-4/2020	EPI_ISL_523016	2020-04-28	G	29775	Mink	Netherlands	0.00%
43	hCoV-19/mink/Netherlands/NB-EMC-1-5/2020	EPI_ISL_523022	2020-04-28	G	29763	Mink	Netherlands	0.00%
44	hCoV-19/mink/Netherlands/NB-EMC-1-6/2020	EPI_ISL_523028	2020-04-28	G	29775	Mink	Netherlands	0.00%
45	hCoV-19/mink/Netherlands/NB-EMC-16-1/2020	EPI_ISL_523029	2020-06-21	G	29636	Mink	Netherlands	0.00%
46	hCoV-19/mink/Netherlands/NB-EMC-16-10/2020	EPI_ISL_523030	2020-06-21	G	29755	Mink	Netherlands	0.00%
47	hCoV-19/mink/Netherlands/NB-EMC-16-13/2020	EPI_ISL_523031	2020-06-21	G	29755	Mink	Netherlands	0.00%
48	hCoV-19/mink/Netherlands/NB-EMC-16-14/2020	EPI_ISL_523032	2020-06-21	G	29755	Mink	Netherlands	0.00%
49	hCoV-19/mink/Netherlands/NB-EMC-16-2/2020	EPI_ISL_523033	2020-06-21	G	29755	Mink	Netherlands	0.00%
50	hCoV-19/mink/Netherlands/NB-EMC-1-7/2020	EPI_ISL_523034	2020-04-28	G	29775	Mink	Netherlands	0.00%
51	hCoV-19/mink/Netherlands/NB-EMC-1-8/2020	EPI_ISL_523040	2020-04-28	G	29775	Mink	Netherlands	3.42%
52	hCoV-19/mink/Netherlands/NB-EMC-1-9/2020	EPI_ISL_523046	2020-04-28	G	29775	Mink	Netherlands	0.00%
53	hCoV-19/mink/Netherlands/NB-EMC-20-1/2020	EPI_ISL_523052	2020-07-09	G	29773	Mink	Netherlands	0.00%
54	hCoV-19/mink/Netherlands/NB-EMC-20-2/2020	EPI_ISL_523053	2020-07-09	G	29775	Mink	Netherlands	0.00%
55	hCoV-19/mink/Netherlands/NB-EMC-20-21/2020	EPI_ISL_523054	2020-07-09	G	29775	Mink	Netherlands	0.00%
56	hCoV-19/mink/Netherlands/NB-EMC-20-23/2020	EPI_ISL_523055	2020-07-09	G	29775	Mink	Netherlands	0.00%
57	hCoV-19/mink/Netherlands/NB-EMC-20-27/2020	EPI_ISL_523056	2020-07-09	G	29775	Mink	Netherlands	0.00%
58	hCoV-19/mink/Netherlands/NB-EMC-20-28/2020	EPI_ISL_523057	2020-07-09	G	29775	Mink	Netherlands	0.00%
59	hCoV-19/mink/Netherlands/NB-EMC-20-3/2020	EPI_ISL_523058	2020-07-09	G	29773	Mink	Netherlands	0.00%
60	hCoV-19/mink/Netherlands/NB-EMC-20-34/2020	EPI_ISL_523059	2020-07-09	G	29775	Mink	Netherlands	0.00%
61	hCoV-19/mink/Netherlands/NB-EMC-20-4/2020	EPI_ISL_523060	2020-07-09	G	29773	Mink	Netherlands	0.00%
62	hCoV-19/mink/Netherlands/NB-EMC-20-5/2020	EPI_ISL_523061	2020-07-09	G	29775	Mink	Netherlands	0.00%
63	hCoV-19/mink/Netherlands/NB-EMC-21-07/2020	EPI_ISL_523062	2020-07-09	G	29772	Mink	Netherlands	0.00%
64	hCoV-19/mink/Netherlands/NB-EMC-21-1/2020	EPI_ISL_523063	2020-07-09	G	29772	Mink	Netherlands	0.00%
65	hCoV-19/mink/Netherlands/NB-EMC-21-14/2020	EPI_ISL_523064	2020-07-09	G	29772	Mink	Netherlands	0.00%
66	hCoV-19/mink/Netherlands/NB-EMC-21-19/2020	EPI_ISL_523065	2020-07-09	G	29772	Mink	Netherlands	0.00%
67	hCoV-19/mink/Netherlands/NB-EMC-21-2/2020	EPI_ISL_523066	2020-07-09	G	29772	Mink	Netherlands	0.00%
68	hCoV-19/mink/Netherlands/NB-EMC-21-20/2020	EPI_ISL_523067	2020-07-09	G	29772	Mink	Netherlands	0.00%
69	hCoV-19/mink/Netherlands/NB-EMC-21-4/2020	EPI_ISL_523069	2020-07-09	G	29772	Mink	Netherlands	0.00%
70	hCoV-19/mink/Netherlands/NB-EMC-21-5/2020	EPI_ISL_523071	2020-07-09	G	29772	Mink	Netherlands	0.00%
71	hCoV-19/mink/Netherlands/NB-EMC-3-2/2020	EPI_ISL_523091	2020-05-06	G	29775	Mink	Netherlands	0.00%
72	hCoV-19/mink/Netherlands/NB-EMC-3-3/2020	EPI_ISL_523092	2020-05-06	G	29775	Mink	Netherlands	0.00%
73	hCoV-19/mink/Netherlands/NB-EMC-3-4/2020	EPI_ISL_523093	2020-05-06	G	29775	Mink	Netherlands	0.77%
74	hCoV-19/mink/Netherlands/NB-EMC-3-5/2020	EPI_ISL_523094	2020-05-06	G	29775	Mink	Netherlands	0.77%
75	hCoV-19/mink/Netherlands/NB-EMC-3-6/2020	EPI_ISL_523095	2020-05-06	G	29775	Mink	Netherlands	0.00%
76	hCoV-19/mink/Netherlands/NB-EMC-4-2/2020	EPI_ISL_523096	2020-05-06	G	29775	Mink	Netherlands	0.00%
77	hCoV-19/mink/Netherlands/NB-EMC-8-11/2020	EPI_ISL_523113	2020-06-01	G	29775	Mink	Netherlands	0.00%
78	hCoV-19/mink/Netherlands/NB-EMC-8-14/2020	EPI_ISL_523114	2020-06-01	G	29775	Mink	Netherlands	0.00%
79	hCoV-19/mink/Netherlands/NB-EMC-8-16/2020	EPI_ISL_523115	2020-06-01	G	29763	Mink	Netherlands	0.00%
80	hCoV-19/mink/Netherlands/NB-EMC-8-8/2020	EPI_ISL_523117	2020-06-01	G	29775	Mink	Netherlands	0.00%
81	hCoV-19/mink/Netherlands/NB-EMC-8-9/2020	EPI_ISL_523118	2020-06-01	G	29775	Mink	Netherlands	0.00%
82	hCoV-19/mink/Netherlands/NB-EMC-14-21/2020	EPI_ISL_523017	2020-06-14	GH	29775	Mink	Netherlands	0.00%
83	hCoV-19/mink/Netherlands/NB-EMC-14-25/2020	EPI_ISL_523018	2020-06-14	GH	29775	Mink	Netherlands	0.00%
84	hCoV-19/mink/Netherlands/NB-EMC-14-3/2020	EPI_ISL_523019	2020-06-14	GH	29775	Mink	Netherlands	0.00%
85	hCoV-19/mink/Netherlands/NB-EMC-14-37/2020	EPI_ISL_523020	2020-06-14	GH	29775	Mink	Netherlands	0.00%
86	hCoV-19/mink/Netherlands/NB-EMC-14-41/2020	EPI_ISL_523021	2020-06-14	GH	29775	Mink	Netherlands	3.80%
87	hCoV-19/mink/Netherlands/NB-EMC-17-10/2020	EPI_ISL_523035	2020-07-02	GH	29775	Mink	Netherlands	0.00%
88	hCoV-19/mink/Netherlands/NB-EMC-17-16/2020	EPI_ISL_523036	2020-07-02	GH	29775	Mink	Netherlands	0.00%
89	hCoV-19/mink/Netherlands/NB-EMC-17-19/2020	EPI_ISL_523037	2020-07-02	GH	29775	Mink	Netherlands	0.00%
90	hCoV-19/mink/Netherlands/NB-EMC-17-3/2020	EPI_ISL_523038	2020-07-02	GH	29775	Mink	Netherlands	0.00%
91	hCoV-19/mink/Netherlands/NB-EMC-17-6/2020	EPI_ISL_523039	2020-07-02	GH	29775	Mink	Netherlands	0.00%
92	hCoV-19/mink/Netherlands/NB-EMC-22-1/2020	EPI_ISL_523074	2020-07-12	GH	29775	Mink	Netherlands	0.00%
93	hCoV-19/mink/Netherlands/NB-EMC-23-1/2020	EPI_ISL_523076	2020-07-14	GH	29775	Mink	Netherlands	0.00%
94	hCoV-19/mink/Netherlands/NB-EMC-23-2/2020	EPI_ISL_523077	2020-07-14	GH	29775	Mink	Netherlands	0.00%
95	hCoV-19/mink/Netherlands/NB-EMC-23-3/2020	EPI_ISL_523078	2020-07-14	GH	29153	Mink	Netherlands	0.76%
96	hCoV-19/mink/Netherlands/NB-EMC-23-4/2020	EPI_ISL_523079	2020-07-14	GH	29775	Mink	Netherlands	0.00%
97	hCoV-19/mink/Netherlands/NB-EMC-23-5/2020	EPI_ISL_523080	2020-07-14	GH	29775	Mink	Netherlands	0.00%
98	hCoV-19/mink/Netherlands/NB-EMC-23-6/2020	EPI_ISL_523081	2020-07-14	GH	29775	Mink	Netherlands	0.00%
99	hCoV-19/mink/Netherlands/NB-EMC-23-7/2020	EPI_ISL_523082	2020-07-14	GH	29775	Mink	Netherlands	0.00%
100	hCoV-19/mink/Netherlands/NB-EMC-26-1/2020	EPI_ISL_523086	2020-07-29	GH	29775	Mink	Netherlands	0.68%
101	hCoV-19/mink/Netherlands/NB-EMC-26-2/2020	EPI_ISL_523087	2020-07-29	GH	29775	Mink	Netherlands	0.00%
102	hCoV-19/mink/Netherlands/NB-EMC-26-5/2020	EPI_ISL_523088	2020-07-29	GH	29775	Mink	Netherlands	7.87%
103	hCoV-19/mink/Netherlands/NB-EMC-6-13/2020	EPI_ISL_523098	2020-05-30	GH	29775	Mink	Netherlands	0.00%
104	hCoV-19/mink/Netherlands/NB-EMC-6-14/2020	EPI_ISL_523099	2020-05-30	GH	29775	Mink	Netherlands	0.00%
105	hCoV-19/mink/Netherlands/NB-EMC-6-15/2020	EPI_ISL_523100	2020-05-30	GH	29766	Mink	Netherlands	0.00%
106	hCoV-19/mink/Netherlands/NB-EMC-6-16/2020	EPI_ISL_523101	2020-05-30	GH	29775	Mink	Netherlands	0.83%
107	hCoV-19/mink/Netherlands/NB-EMC-6-17/2020	EPI_ISL_523102	2020-05-30	GH	29775	Mink	Netherlands	1.60%
108	hCoV-19/mink/Netherlands/NB-EMC-6-18/2020	EPI_ISL_523103	2020-05-30	GH	29775	Mink	Netherlands	0.00%
109	hCoV-19/mink/Netherlands/NB-EMC-6-2/2020	EPI_ISL_523104	2020-05-30	GH	29775	Mink	Netherlands	0.00%
110	hCoV-19/mink/Netherlands/NB-EMC-6-3/2020	EPI_ISL_523105	2020-05-30	GH	29775	Mink	Netherlands	0.00%
111	hCoV-19/mink/Netherlands/NB-EMC-6-7/2020	EPI_ISL_523106	2020-05-30	GH	29775	Mink	Netherlands	0.00%
112	hCoV-19/mink/Netherlands/NB-EMC-7-1/2020	EPI_ISL_523107	2020-05-30	GH	29775	Mink	Netherlands	1.46%
113	hCoV-19/mink/Netherlands/NB-EMC-7-10/2020	EPI_ISL_523108	2020-05-30	GH	29775	Mink	Netherlands	0.00%
114	hCoV-19/mink/Netherlands/NB-EMC-7-19/2020	EPI_ISL_523109	2020-05-30	GH	29775	Mink	Netherlands	0.00%
115	hCoV-19/mink/Netherlands/NB-EMC-7-2/2020	EPI_ISL_523110	2020-05-30	GH	29775	Mink	Netherlands	0.83%
116	hCoV-19/mink/Netherlands/NB-EMC-7-3/2020	EPI_ISL_523111	2020-05-30	GH	29775	Mink	Netherlands	0.00%
117	hCoV-19/mink/Netherlands/NB-EMC-7-6/2020	EPI_ISL_523112	2020-05-30	GH	29775	Mink	Netherlands	0.00%
118	hCoV-19/mink/Netherlands/NB-EMC-9-1/2020	EPI_ISL_523119	2020-06-03	GH	29775	Mink	Netherlands	0.00%
119	hCoV-19/mink/Netherlands/NB-EMC-9-3/2020	EPI_ISL_523120	2020-06-03	GH	29472	Mink	Netherlands	5.26%
120	hCoV-19/mink/Netherlands/NB02_03KS/2020	EPI_ISL_447627	2020-04-29	L	29878	Mink	Netherlands	0.00%
121	hCoV-19/mink/Netherlands/NB02_06KS/2020	EPI_ISL_447628	2020-04-29	L	29878	Mink	Netherlands	0.00%
122	hCoV-19/mink/Netherlands/NB02_07KS/2020	EPI_ISL_447629	2020-04-29	L	29877	Mink	Netherlands	0.00%
123	hCoV-19/mink/Netherlands/NB02_13KS/2020	EPI_ISL_447630	2020-04-29	L	29871	Mink	Netherlands	0.00%
124	hCoV-19/mink/Netherlands/NB02_index/2020	EPI_ISL_447631	2020-04-25	L	29874	Mink	Netherlands	0.00%
125	hCoV-19/mink/Netherlands/NB02_16RS/2020	EPI_ISL_447632	2020-04-28	L	29876	Mink	Netherlands	0.00%
126	hCoV-19/mink/Netherlands/NB-EMC-10-13/2020	EPI_ISL_522987	2020-06-07	L	29772	Mink	Netherlands	0.00%
127	hCoV-19/mink/Netherlands/NB-EMC-10-2/2020	EPI_ISL_522988	2020-06-07	L	29772	Mink	Netherlands	0.00%
128	hCoV-19/mink/Netherlands/NB-EMC-10-5/2020	EPI_ISL_522989	2020-06-07	L	29772	Mink	Netherlands	0.00%
129	hCoV-19/mink/Netherlands/NB-EMC-10-8/2020	EPI_ISL_522990	2020-06-07	L	29772	Mink	Netherlands	0.00%
130	hCoV-19/mink/Netherlands/NB-EMC-15-11/2020	EPI_ISL_523023	2020-06-21	L	29772	Mink	Netherlands	0.00%
131	hCoV-19/mink/Netherlands/NB-EMC-15-2/2020	EPI_ISL_523024	2020-06-21	L	29766	Mink	Netherlands	0.00%
132	hCoV-19/mink/Netherlands/NB-EMC-15-3/2020	EPI_ISL_523025	2020-06-21	L	29772	Mink	Netherlands	0.00%
133	hCoV-19/mink/Netherlands/NB-EMC-15-7/2020	EPI_ISL_523026	2020-06-21	L	29766	Mink	Netherlands	0.00%
134	hCoV-19/mink/Netherlands/NB-EMC-15-8/2020	EPI_ISL_523027	2020-06-21	L	29772	Mink	Netherlands	0.00%
135	hCoV-19/mink/Netherlands/NB-EMC-18-14/2020	EPI_ISL_523041	2020-07-04	L	29772	Mink	Netherlands	0.00%
136	hCoV-19/mink/Netherlands/NB-EMC-18-15/2020	EPI_ISL_523042	2020-07-04	L	29772	Mink	Netherlands	0.00%
137	hCoV-19/mink/Netherlands/NB-EMC-18-17/2020	EPI_ISL_523043	2020-07-04	L	29772	Mink	Netherlands	0.00%
138	hCoV-19/mink/Netherlands/NB-EMC-18-20/2020	EPI_ISL_523044	2020-07-04	L	29772	Mink	Netherlands	0.00%
139	hCoV-19/mink/Netherlands/NB-EMC-18-8/2020	EPI_ISL_523045	2020-07-04	L	29772	Mink	Netherlands	0.00%
140	hCoV-19/mink/Netherlands/NB-EMC-19-1/2020	EPI_ISL_523047	2020-07-05	L	29772	Mink	Netherlands	1.46%
141	hCoV-19/mink/Netherlands/NB-EMC-19-12/2020	EPI_ISL_523048	2020-07-05	L	29772	Mink	Netherlands	0.00%
142	hCoV-19/mink/Netherlands/NB-EMC-19-15/2020	EPI_ISL_523049	2020-07-05	L	29772	Mink	Netherlands	0.00%
143	hCoV-19/mink/Netherlands/NB-EMC-19-19/2020	EPI_ISL_523050	2020-07-05	L	29772	Mink	Netherlands	0.00%
144	hCoV-19/mink/Netherlands/NB-EMC-19-9/2020	EPI_ISL_523051	2020-07-05	L	29772	Mink	Netherlands	0.00%
145	hCoV-19/mink/Netherlands/NB-EMC-2-13/2020	EPI_ISL_523068	2020-04-27	L	29772	Mink	Netherlands	2.28%
146	hCoV-19/mink/Netherlands/NB-EMC-2-14/2020	EPI_ISL_523070	2020-04-27	L	29772	Mink	Netherlands	0.00%
147	hCoV-19/mink/Netherlands/NB-EMC-2-19/2020	EPI_ISL_523072	2020-04-27	L	29772	Mink	Netherlands	1.08%
148	hCoV-19/mink/Netherlands/NB-EMC-2-2/2020	EPI_ISL_523073	2020-04-27	L	29772	Mink	Netherlands	1.73%
149	hCoV-19/mink/Netherlands/NB-EMC-2-3/2020	EPI_ISL_523075	2020-04-27	L	29772	Mink	Netherlands	0.81%
150	hCoV-19/mink/Netherlands/NB-EMC-25-11/2020	EPI_ISL_523083	2020-07-26	L	29768	Mink	Netherlands	0.00%
151	hCoV-19/mink/Netherlands/NB-EMC-25-12/2020	EPI_ISL_523084	2020-07-26	L	29765	Mink	Netherlands	0.58%
152	hCoV-19/mink/Netherlands/NB-EMC-2-6/2020	EPI_ISL_523085	2020-04-27	L	29772	Mink	Netherlands	0.00%
153	hCoV-19/mink/Netherlands/NB-EMC-2-8/2020	EPI_ISL_523090	2020-04-27	L	29772	Mink	Netherlands	4.40%
154	hCoV-19/mink/Netherlands/NB-EMC-5-13/2020	EPI_ISL_523097	2020-05-30	L	29772	Mink	Netherlands	0.00%
155	hCoV-19/mink/Netherlands/NB-EMC-8-20/2020	EPI_ISL_523116	2020-06-01	L	29772	Mink	Netherlands	0.00%
156	hCoV-19/mink/Netherlands/NB-EMC-2-7/2020	EPI_ISL_523089	2020-04-27	O	29772	Mink	Netherlands	5.64%
157	hCoV-19/mouse/Harbin/HRB-26m/2020	EPI_ISL_459910	2020-04-19	L	29869	Mouse	China	0.00%
158	hCoV-19/tiger/USA/NY-040420/2020	EPI_ISL_420293	2020-04-02	GH	29897	Tiger	USA	0.00%
159	hCoV-19/Belgium/ULG-10233/2020	EPI_ISL_498139	2020-05-16	G	29782	Human	Belgium	0.00%
160	hCoV-19/Spain/IB-IBV-99007217/2020	EPI_ISL_541958	2020-03-17	G	29813	Human	Spain	0.64%
161	hCoV-19/Spain/IB-IBV-99007252/2020	EPI_ISL_541965	2020-03-05	G	29815	Human	Spain	0.13%
162	hCoV-19/France/GE8802/2020	EPI_ISL_560630	2020-04-14	G	29782	Human	France	0.00%
163	hCoV-19/France/GE8804/2020	EPI_ISL_560631	2020-04-16	G	29782	Human	France	0.00%
164	hCoV-19/France/GE8807/2020	EPI_ISL_560633	2020-04-23	G	29781	Human	France	0.01%
165	hCoV-19/England/GSTT-5688/2020	EPI_ISL_560702	2020-03-22	G	29782	Human	England	0.52%
166	hCoV-19/England/GSTT-6732/2020	EPI_ISL_560723	2020-03-29	G	29611	Human	England	0.01%
167	hCoV-19/England/GSTT-6767/2020	EPI_ISL_560731	2020-03-30	G	29302	Human	England	0.91%
168	hCoV-19/Belgium/ULG-10223/2020	EPI_ISL_498129	2020-05-15	GR	29782	Human	Belgium	0.00%
169	hCoV-19/Belgium/ULG-10232/2020	EPI_ISL_498138	2020-05-16	GR	29782	Human	Belgium	0.00%
170	hCoV-19/France/CVL8278/2020	EPI_ISL_560574	2020-03-25	GR	29843	Human	France	0.00%
171	hCoV-19/France/CVL8280/2020	EPI_ISL_560575	2020-04-07	GR	29840	Human	France	0.00%
172	hCoV-19/France/CVL8294/2020	EPI_ISL_560579	2020-04-07	GR	29831	Human	France	0.00%
173	hCoV-19/England/GSTT-5203/2020	EPI_ISL_560661	2020-03-19	GR	29782	Human	England	0.01%
174	hCoV-19/England/GSTT-6773/2020	EPI_ISL_560734	2020-03-30	GR	29611	Human	England	0.01%
175	hCoV-19/England/GSTT-6885/2020	EPI_ISL_560740	2020-03-30	GR	29302	Human	England	0.00%
176	hCoV-19/Spain/VC-IBV-98003112/2020	EPI_ISL_538048	2020-03-15	GR	29793	Human	Spain	0.28%
177	hCoV-19/Spain/CT-ISCIII-2012573/2020	EPI_ISL_539540	2020-05-21	GR	29903	Human	Spain	0.00%
178	hCoV-19/Belgium/rega-0309752/2020	EPI_ISL_522349	2020-03-09	O	29782	Human	Belgium	0.00%
179	hCoV-19/France/IDF-10068ND/2020	EPI_ISL_447691	2020-03	O	29903	Human	France	0.00%
180	hCoV-19/France/IDF-10070SK/2020	EPI_ISL_447731	2020-03	O	29903	Human	France	0.00%
181	hCoV-19/France/IDF-40002VJ/2020	EPI_ISL_447733	2020-03	O	29903	Human	France	0.00%
182	hCoV-19/Belgium/rega-0309752/2020	EPI_ISL_522349	2020-03-09	O_1	29782	Human	Belgium	0.00%
183	hCoV-19/England/LEED-2A9E76/2020	EPI_ISL_538934	2020-03-25	O	29782	Human	England	0.00%
184	hCoV-19/England/LEED-2A83C3/2020	EPI_ISL_538993	2020-03-28	O	29782	Human	England	0.00%
185	hCoV-19/England/LEED-2A8D89/2020	EPI_ISL_539147	2020-03-24	O	29782	Human	England	0.01%
186	hCoV-19/Spain/NA-ISCIII-201944/2020	EPI_ISL_539569	2020-03-09	O	29903	Human	Spain	0.00%
187	hCoV-19/Spain/NA-ISCIII-201952/2020	EPI_ISL_539572	2020-03-09	O	29903	Human	Spain	0.00%
188	hCoV-19/Hong Kong/VM20002907/2020	EPI_ISL_414517	2020-02-25	GR	29764	Human	Hong Kong	0.00%
189	hCoV-19/Hong Kong/VM20002868/2020	EPI_ISL_414519	2020-02-24	GR	29764	Human	Hong Kong	0.00%
190	hCoV-19/Hong Kong/VM20002849/2020	EPI_ISL_414571	2020-02-22	GR	29764	Human	Hong Kong	0.00%
191	hCoV-19/Hong Kong/HKPU61-0202/2020	EPI_ISL_419229	2020-02-17	GR	29782	Human	Hong Kong	0.96%
192	hCoV-19/Hong Kong/HKPU64-1202/2020	EPI_ISL_419232	2020-02-19	GR	29782	Human	Hong Kong	0.00%
193	hCoV-19/Hong Kong/HKPU74-1302/2020	EPI_ISL_419245	2020-02-22	GR	29782	Human	Hong Kong	0.10%
194	hCoV-19/Hong Kong/HKPU83-1702/2020	EPI_ISL_419247	2020-02-24	GR	29782	Human	Hong Kong	0.00%
195	hCoV-19/Hong Kong/HKPU89-2502/2020	EPI_ISL_419250	2020-02-26	GR	29782	Human	Hong Kong	0.00%
196	hCoV-19/Hong Kong/HKPU91-2002/2020	EPI_ISL_419252	2020-02-26	GR	29782	Human	Hong Kong	0.80%
197	hCoV-19/Hong Kong/VM2003179/2020	EPI_ISL_450405	2020-03-08	GR	29764	Human	Hong Kong	0.00%
198	hCoV-19/Hong Kong/VM20003443/2020	EPI_ISL_476801	2020-03-15	GR	29799	Human	Hong Kong	0.00%
199	hCoV-19/Hong Kong/VM20003442/2020	EPI_ISL_476802	2020-03-14	GR	29799	Human	Hong Kong	0.00%
200	hCoV-19/Hong Kong/VM20004178/2020	EPI_ISL_476804	2020-03-19	GR	29799	Human	Hong Kong	0.00%
201	hCoV-19/Hong Kong/HKU-200723-073/2020	EPI_ISL_497840	2020-03-18	GR	29782	Human	Hong Kong	0.00%
202	hCoV-19/Hong Kong/HKU-200723-078/2020	EPI_ISL_497845	2020-03-16	GR	29782	Human	Hong Kong	0.00%
203	hCoV-19/Hong Kong/HKU-200723-079/2020	EPI_ISL_497846	2020-03-20	GR	29782	Human	Hong Kong	0.00%
204	hCoV-19/Hong Kong/HKU-200723-083/2020	EPI_ISL_497850	2020-03-15	GR	29782	Human	Hong Kong	0.01%
205	hCoV-19/Hong Kong/HKU-200723-089/2020	EPI_ISL_497856	2020-03-09	GR	29782	Human	Hong Kong	0.84%
206	hCoV-19/Hong Kong/HKU-200723-097/2020	EPI_ISL_497864	2020-03-18	GR	29782	Human	Hong Kong	0.00%
207	hCoV-19/Hong Kong/HKU-200723-103/2020	EPI_ISL_497870	2020-03-18	GR	29782	Human	Hong Kong	0.00%
208	hCoV-19/Hong Kong/HKPU45-0502/2020	EPI_ISL_419221	2020-02-11	O	29782	Human	Hong Kong	0.26%
209	hCoV-19/Hong Kong/HKPU48-0202/2020	EPI_ISL_419222	2020-02-11	O	29782	Human	Hong Kong	0.00%
210	hCoV-19/Hong Kong/HKPU52-3101/2020	EPI_ISL_419224	2020-02-13	O	29782	Human	Hong Kong	0.00%
211	hCoV-19/Hong Kong/HKPU53-0802/2020	EPI_ISL_419225	2020-02-13	O	29782	Human	Hong Kong	0.91%
212	hCoV-19/Hong Kong/HKPU54-0302/2020	EPI_ISL_419226	2020-02-13	O	29782	Human	Hong Kong	0.05%
213	hCoV-19/Hong Kong/HKPU61-0202/2020	EPI_ISL_419229	2020-02-17	O	29782	Human	Hong Kong	0.96%
214	hCoV-19/Hong Kong/HKU-200723-016/2020	EPI_ISL_497783	2020-02-03	O	29782	Human	Hong Kong	0.00%
215	hCoV-19/Hong Kong/HKU-200723-017/2020	EPI_ISL_497784	2020-02-24	O	29782	Human	Hong Kong	0.00%
216	hCoV-19/Hong Kong/HKU-200723-045/2020	EPI_ISL_497812	2020-02-15	O	29782	Human	Hong Kong	0.99%
217	hCoV-19/Hong Kong/HKU-200723-081/2020	EPI_ISL_497848	2020-02-15	O	29782	Human	Hong Kong	0.99%
218	hCoV-19/Netherlands/NA_296/2020	EPI_ISL_422605	2020-04-01	G	29775	Human	Netherlands	0.00%
219	hCoV-19/Netherlands/NA_303/2020	EPI_ISL_422612	2020-04-01	G	29775	Human	Netherlands	0.00%
220	hCoV-19/Netherlands/NA_306/2020	EPI_ISL_422615	2020-04-01	G	29775	Human	Netherlands	0.00%
221	hCoV-19/Netherlands/NA_316/2020	EPI_ISL_422625	2020-04-02	G	29775	Human	Netherlands	0.00%
222	hCoV-19/Netherlands/Flevoland_4/2020	EPI_ISL_455113	2020-04-01	G	29775	Human	Netherlands	0.00%
223	hCoV-19/Netherlands/NA_447/2020	EPI_ISL_455249	2020-04-01	G	29775	Human	Netherlands	0.00%
224	hCoV-19/Netherlands/NA_456/2020	EPI_ISL_455258	2020-04-01	G	29775	Human	Netherlands	0.00%
225	hCoV-19/Netherlands/NoordHolland_10/2020	EPI_ISL_460791	2020-04-01	G	29775	Human	Netherlands	0.00%
226	hCoV-19/Netherlands/NoordHolland_9/2020	EPI_ISL_460798	2020-04-01	G	29775	Human	Netherlands	0.00%
227	hCoV-19/Netherlands/ZuidHolland_165/2020	EPI_ISL_461337	2020-04-01	G	29775	Human	Netherlands	0.00%
228	hCoV-19/Netherlands/NA_291/2020	EPI_ISL_422600	2020-04-01	GH	29775	Human	Netherlands	0.00%
229	hCoV-19/Netherlands/NA_301/2020	EPI_ISL_422610	2020-04-01	GH	29775	Human	Netherlands	0.00%
230	hCoV-19/Netherlands/NA_311/2020	EPI_ISL_422620	2020-04-02	GH	29775	Human	Netherlands	0.83%
231	hCoV-19/Netherlands/Utrecht_10029/2020	EPI_ISL_454778	2020-04-03	GH	29891	Human	Netherlands	0.00%
232	hCoV-19/Netherlands/NoordBrabant_107/2020	EPI_ISL_455291	2020-04-04	GH	29775	Human	Netherlands	0.00%
233	hCoV-19/Netherlands/ZuidHolland_107/2020	EPI_ISL_455296	2020-04-04	GH	29775	Human	Netherlands	0.00%
234	hCoV-19/Netherlands/Gelderland_15/2020	EPI_ISL_460651	2020-04-03	GH	29775	Human	Netherlands	0.00%
235	hCoV-19/Netherlands/Gelderland_16/2020	EPI_ISL_460652	2020-04-03	GH	29775	Human	Netherlands	0.00%
236	hCoV-19/Netherlands/NA_685/2020	EPI_ISL_461120	2020-04-05	GH	29775	Human	Netherlands	0.00%
237	hCoV-19/Netherlands/NH-RIVM-10061/2020	EPI_ISL_547494	2020-04-01	GH	29782	Human	Netherlands	0.00%
238	hCoV-19/Netherlands/NA_313/2020	EPI_ISL_422622	2020-04-02	L	29772	Human	Netherlands	0.83%
239	hCoV-19/Netherlands/Utrecht_10032/2020	EPI_ISL_454781	2020-04-04	L	29856	Human	Netherlands	0.00%
240	hCoV-19/Netherlands/NoordBrabant_10045/2020	EPI_ISL_454794	2020-04-07	L	29823	Human	Netherlands	0.00%
241	hCoV-19/Netherlands/NA_340/2020	EPI_ISL_455145	2020-04-04	L	29772	Human	Netherlands	0.62%
242	hCoV-19/Netherlands/Gelderland_34/2020	EPI_ISL_460934	2020-04-12	L	29772	Human	Netherlands	0.00%
243	hCoV-19/Netherlands/Limburg_22/2020	EPI_ISL_461010	2020-04-25	L	29775	Human	Netherlands	0.00%
244	hCoV-19/Netherlands/NoordBrabant_130/2020	EPI_ISL_461165	2020-04-08	L	29772	Human	Netherlands	0.83%
245	hCoV-19/Netherlands/Zeeland_6/2020	EPI_ISL_461288	2020-04-02	L	29772	Human	Netherlands	0.83%
246	hCoV-19/Netherlands/UT-RIVM-10135/2020	EPI_ISL_547537	2020-04-04	L	29782	Human	Netherlands	0.00%
247	hCoV-19/Netherlands/NB-EMC-185/2020	EPI_ISL_523308	2020-05-07	O	29775	Human	Netherlands	0.00%
248	hCoV-19/Netherlands/ZE-EMC-48/2020	EPI_ISL_523547	2020-05-07	O	29775	Human	Netherlands	0.00%
249	hCoV-19/Beijing/DT-travelDE01/2020	EPI_ISL_452329	2020-03-13	L	29903	Human	China	0.00%
250	hCoV-19/Beijing/DT-travelIRI01/2020	EPI_ISL_452333	2020-03-12	L	29903	Human	China	0.00%
251	hCoV-19/Beijing/DT-travelUK02/2020	EPI_ISL_452335	2020-03-16	L	29903	Human	China	0.00%
252	hCoV-19/Beijing/DT-travelUK04/2020	EPI_ISL_452336	2020-03-20	L	29903	Human	China	0.00%
253	hCoV-19/Beijing/DT-travelIT04/2020	EPI_ISL_452351	2020-03-04	L	29903	Human	China	0.00%
254	hCoV-19/Wuhan/HB-WH1-122/2020	EPI_ISL_454904	2020-03-02	L	29903	Human	China	0.00%
255	hCoV-19/Wuhan/HB-WH1-125/2020	EPI_ISL_454906	2020-03-02	L	29903	Human	China	0.00%
256	hCoV-19/Wuhan/HB-WH1-127/2020	EPI_ISL_454908	2020-03-02	L	29903	Human	China	0.00%
257	hCoV-19/Wuhan/HB-WH1-130/2020	EPI_ISL_454909	2020-03-02	L	29903	Human	China	0.00%
258	hCoV-19/Wuhan/HB-WH1-137/2020	EPI_ISL_454914	2020-03-03	L	29903	Human	China	0.00%
259	hCoV-19/Wuhan/HB-WH1-141/2020	EPI_ISL_454917	2020-03-03	L	29903	Human	China	0.00%
260	hCoV-19/Wuhan/HB-WH1-142/2020	EPI_ISL_454918	2020-03-01	L	29903	Human	China	0.00%
261	hCoV-19/Wuhan/HB-WH3-179/2020	EPI_ISL_454941	2020-03-13	L	29903	Human	China	0.00%
262	hCoV-19/Wuhan/HB-WH3-181/2020	EPI_ISL_454942	2020-03-02	L	29903	Human	China	0.00%
263	hCoV-19/Wuhan/HB-WH3-182/2020	EPI_ISL_454943	2020-03-02	L	29903	Human	China	0.00%
264	hCoV-19/Wuhan/HB-WH4-194/2020	EPI_ISL_454948	2020-03-24	L	29903	Human	China	0.00%
265	hCoV-19/Wuhan/HB-WH4-195/2020	EPI_ISL_454949	2020-03-22	L	29903	Human	China	0.00%
266	hCoV-19/Wuhan/HB-WH4-196/2020	EPI_ISL_454950	2020-03-20	L	29903	Human	China	0.00%
267	hCoV-19/Wuhan/HB-WH4-197/2020	EPI_ISL_454951	2020-03-25	L	29903	Human	China	0.00%
268	hCoV-19/Wuhan/HB-WH4-204/2020	EPI_ISL_454954	2020-03-17	L	29903	Human	China	0.00%
269	hCoV-19/Wuhan/HB-WH4-205/2020	EPI_ISL_454955	2020-03-01	L	29903	Human	China	0.00%
270	hCoV-19/Wuhan/HB-WH4-206/2020	EPI_ISL_454956	2020-03-27	L	29903	Human	China	0.00%
271	hCoV-19/Wuhan/HB-WH4-208/2020	EPI_ISL_454957	2020-03-19	L	29903	Human	China	0.00%
272	hCoV-19/Wuhan/HB-WH4-209/2020	EPI_ISL_454958	2020-03-19	L	29903	Human	China	0.00%
273	hCoV-19/Wuhan/HB-WH4-214/2020	EPI_ISL_454963	2020-03-20	L	29903	Human	China	0.00%
274	hCoV-19/Wuhan/HB-WH5-224/2020	EPI_ISL_454969	2020-03-16	L	29903	Human	China	0.00%
275	hCoV-19/Wuhan/HB-WH5-233/2020	EPI_ISL_454976	2020-03-04	L	29903	Human	China	0.00%
276	hCoV-19/Wuhan/HB-WH5-237/2020	EPI_ISL_454978	2020-03-14	L	29903	Human	China	0.00%
277	hCoV-19/Wuhan/HB-WH6-247/2020	EPI_ISL_454984	2020-03-15	L	29903	Human	China	0.00%
278	hCoV-19/Harbin/HRB-26/2020	EPI_ISL_459909	2020-03-02	L	29891	Human	China	0.00%
279	hCoV-19/USA/NY-NYUMC836/2020	EPI_ISL_456109	2020-04-21	GH	29788	Human	USA	0.05%
280	hCoV-19/USA/NY-NYUMC840/2020	EPI_ISL_456112	2020-04-24	GH	29901	Human	USA	0.00%
281	hCoV-19/USA/NY-NYUMC887/2020	EPI_ISL_467380	2020-04-30	GH	29901	Human	USA	0.00%
282	hCoV-19/USA/NY-NYUMC888/2020	EPI_ISL_467381	2020-04-03	GH	29891	Human	USA	0.00%
283	hCoV-19/USA/NY-NYUMC892/2020	EPI_ISL_467385	2020-04-10	GH	29901	Human	USA	0.57%
284	hCoV-19/USA/NY-NYUMC630/2020	EPI_ISL_444747	2020-04-02	GH	29902	Human	USA	0.00%
285	hCoV-19/USA/NY-NYUMC631/2020	EPI_ISL_444748	2020-04-02	GH	29902	Human	USA	0.00%
286	hCoV-19/USA/NY-NYUMC632/2020	EPI_ISL_444749	2020-04-02	GH	29902	Human	USA	0.00%
287	hCoV-19/USA/NY-NYUMC633/2020	EPI_ISL_444750	2020-04-02	GH	29882	Human	USA	0.00%
288	hCoV-19/USA/NY-NYUMC634/2020	EPI_ISL_444751	2020-04-02	GH	29902	Human	USA	0.00%
289	hCoV-19/USA/NY-NYUMC635/2020	EPI_ISL_444752	2020-04-02	GH	29902	Human	USA	0.00%
290	hCoV-19/USA/NY-NYUMC636/2020	EPI_ISL_444753	2020-04-02	GH	29902	Human	USA	0.00%
291	hCoV-19/USA/NY-NYUMC637/2020	EPI_ISL_444754	2020-04-02	GH	29858	Human	USA	0.00%
292	hCoV-19/USA/NY-NYUMC639/2020	EPI_ISL_444756	2020-04-02	GH	29901	Human	USA	0.00%
293	hCoV-19/USA/NY-NYUMC640/2020	EPI_ISL_444757	2020-04-03	GH	29902	Human	USA	0.00%
294	hCoV-19/USA/NY-Wadsworth-42409-01/2020	EPI_ISL_525663	2020-04-09	GH	29826	Human	USA	0.00%
295	hCoV-19/USA/NY-Wadsworth-43319-01/2020	EPI_ISL_525664	2020-04-09	GH	29822	Human	USA	0.00%
296	hCoV-19/USA/NY-Wadsworth-43604-01/2020	EPI_ISL_525665	2020-04-10	GH	29822	Human	USA	0.00%
297	hCoV-19/USA/NY-Wadsworth-44440-01/2020	EPI_ISL_525666	2020-04-10	GH	29822	Human	USA	0.00%
298	hCoV-19/USA/NY-Wadsworth-44600-01/2020	EPI_ISL_525669	2020-04-10	GH	29822	Human	USA	0.00%
299	hCoV-19/USA/NY-Wadsworth-44639-01/2020	EPI_ISL_525670	2020-04-10	GH	29822	Human	USA	0.00%
300	hCoV-19/USA/NY-Wadsworth-46188-01/2020	EPI_ISL_525675	2020-04-13	GH	29813	Human	USA	0.00%
301	hCoV-19/USA/NY-Wadsworth-46320-01/2020	EPI_ISL_525680	2020-04-11	GH	29834	Human	USA	0.00%
302	hCoV-19/USA/NY-Wadsworth-50113-01/2020	EPI_ISL_525684	2020-04-15	GH	29822	Human	USA	0.00%
303	hCoV-19/USA/NY-Wadsworth-57118-01/2020	EPI_ISL_525686	2020-04-20	GH	29822	Human	USA	0.00%
304	hCoV-19/USA/NY-MH001827/2020	EPI_ISL_526687	2020-04-16	GH	29716	Human	USA	0.00%
305	hCoV-19/USA/NY-WC-46316-01/2020	EPI_ISL_529035	2020-04-13	GH	29834	Human	USA	0.00%
306	hCoV-19/USA/NY-WC-46317-01/2020	EPI_ISL_529036	2020-04-11	GH	29834	Human	USA	0.09%
307	hCoV-19/USA/NY-ISMMS-MH001827N/2020	EPI_ISL_548243	2020-04-11	GH	29716	Human	USA	0.00%
308	hCoV-19/USA/NY-ISMMS-MH001832N/2020	EPI_ISL_548244	2020-04-15	GH	29720	Human	USA	0.00%
309	Bat coronavirus RaTG13	MN996532.1	2005	-	29855	Rhinolophus affinis	China	0.00%
310	Pangolin coronavirus MP789	MT121216.1	2019-03-29	-	29751	Pangolin	China	0
