# Supplementary material for: Mutational spectra of SARS-CoV-2 isolated from animals
Source: PeerJ. 2020 Dec 18;8:e10609. doi: 10.7717/peerj.10609 (PMC7751428; doi:10.7717/peerj.10609)
Supplement: Supplemental Information 2 [file peerj-08-10609-s002.xlsx]

## Sheet: Supplemetary Table 2
Gene	Position within the gene	Genomic position	Nucleotide change						Codon change	Amino acid change	Number of mutations in animal isolates	% of mutations in animal isolates	Number of mutations in human isolates	% of mutations in human isolates	Notes
			Human isolates	Dog	Cat	Mink	Mouse	Tiger
orf1ab	15	280	C	C	C	T	C	C	GTC-GTT	No change	1	0.680272	0	0	Unique for mink
	114	379	C	C	C	T	C	C	GTC-GTT	No change	1	0.680272	0	0	Unique for mink
	213	478	C	C	C	T	C	C	ATC-ATT	No change	1	0.680272	0	0	Unique for mink
	249	514	T and C	T	T	C	T	T	CAT-CAC	No change	27	18.3673	6	4	Present in mink and human
	255	520	G	G	G	A	G	G	ATG-ATA	M85I	1	0.680272	0	0	Unique for mink
	264	529	G	G	G	A	G	G	CTG-CTA	No change	1	0.680272	0	0	Unique for mink
	283	548	A	A	A	G	A	A	ATT-GTT	I95V	1	0.680272	0	0	Unique for mink
	441	706	C	C	C	T	C	C	GAC-GAT	No change	1	0.680272	0	0	Unique for mink
	794	1059	C and T	C	T	C	C	T	ACC-ATC	T265I	2	1.36054	29	19.3333	Present in cat, tiger, and human
	1054	1319	G	G	G	C	G	G	GAA-CAA	E352Q	4	2.72109	0	0	Unique for mink
	1115	1380	C	C	C	T	C	C	GCA-GTA	A372V	68	46.2585	0	0	Unique for mink
	1162	1427	C	C	T	C	C	C	CAT-TAT	H388Y	2	33.3333	0	0	Unique for cat
	1192	1457	C	C	C	T	C	C	CGT-TGT	R398C	37	25.1701	0	0	Unique for mink
	1213	1478	G	G	G	A	G	G	GCC-ACC	A405T	7	4.7619	0	0	Unique for mink
	1329	1594	C and T	C	C	T	C	C	TCC-TCT	No change	38	25.8503	4	2.66667	Present in mink and human
	1334	1599	G	G	G	T	G	G	GGT-GTT	G445V	1	0.680272	0	0	Unique for mink
	1492	1757	G	G	G	C	G	G	GCA-CCA	A498P	1	0.680272	0	0	Unique for mink
	1619	1884	C	C	C	T	C	C	GCT-GTT	A540V	2	1.36054	0	0	Unique for mink
	1956	2221	C	C	C	T	C	C	ATC-ATT	No change	2	1.36054	0	0	Unique for mink
	2015	2280	A	A	A	C	A	A	AAG-ACG	K672T	2	1.36054	0	0	Unique for mink
	2223	2488	C	C	C	T	C	C	TTC-TTT	No change	1	0.680272	0	0	Unique for mink
	2228	2493	A	A	A	T	A	A	GAG-GTG	E743V	4	2.72109	0	0	Unique for mink
	2626	2891	G and A	G	G	A	G	G	GCA-ACA	A876T	2	1.36054	3	2	Present in mink and human
	2661	2926	T	T	T	C	T	T	TCT-TCC	No change	5	3.40136	0	0	Unique for mink
	2772	3037	C and T	T	T	T	C	T	TTC-TTT	No change	109	69.4268	81	54	Present in all except the mouse
	2857	3122	G	G	T	G	G	G	GAT-TAT	D953Y	1	16.6667	0	0	Unique for cat
	2938	3203	T	T	T	C	T	T	TTA-CTA	No change	1	0.680272	0	0	Unique for mink
	2986	3251	G and T	G	G	T	G	G	GAC-TAC	D996Y	30	20.4082	1	0.666667	Present in mink and human
	3154	3419	G	G	A	G	G	G	GTA-ATA	V1052I	2	33.3333	0	0	Unique for cat
	3287	3552	C	C	C	T	C	C	CCA-CTA	P1096L	6	4.08163	0	0	Unique for mink
	3337	3602	C	C	C	T	C	C	CAC-TAC	H1113Y	6	4.08163	0	0	Unique for mink
	3377	3642	A	A	A	G	A	A	GAA-GGA	E1126G	1	0.680272	0	0	Unique for mink
	3578	3843	T	T	T	A	T	T	ATG-AAG	M1193K	1	0.680272	0	0	Unique for mink
	3606	3871	G	G	G	T	G	G	AAG-AAT	K1202N	2	1.36054	0	0	Unique for mink
	3611	3876	C	C	C	T	C	C	GCT-GTT	A1204V	1	0.680272	0	0	Unique for mink
	3706	3971	G	G	G	A	G	G	GTT-ATT	V1236I	1	0.680272	0	0	Unique for mink
	3737	4002	C	C	C	T	C	C	ACT-ATT	T1246I	2	1.36054	0	0	Unique for mink
	3942	4207	G	G	G	T	G	G	GCG-GCT	No change	6	4.08163	0	0	Unique for mink
	3990	4255	G	G	G	T	G	G	CCG-CCT	No change	4	2.72109	0	0	Unique for mink
	4191	4456	C	C	C	C	T	C	GCC-GCT	No change	1	100	0	0	Unique for mouse
	4277	4542	C	C	C	A	C	C	ACC-AAC	T1426N	1	0.680272	0	0	Unique for mink
	4321	4586	C	C	C	T	C	C	CTA-TTA	No change	1	0.680272	0	0	Unique for mink
	4702	4967	A	A	A	G	A	A	ATT-GTT	I1568V	16	10.8844	0	0	Unique for mink
	4763	5028	T	T	T	A	T	T	ATG-AAG	M1588K	17	11.5646	0	0	Unique for mink
	4908	5173	C	C	C	T	C	C	CAC-CAT	No change	4	2.72109	0	0	Unique for mink
	4974	5239	C	C	C	T	C	C	TAC-TAT	No change	1	0.680272	0	0	Unique for mink
	5232	5497	C	C	C	T	C	C	TGC-TGT	No change	1	0.680272	0	0	Unique for mink
	5568	5833	C	C	C	A	C	C	TCC-TCA	No change	1	0.680272	0	0	Unique for mink
	5762	6027	C	C	C	T	C	C	CCA-CTA	P1921L	1	0.680272	0	0	Unique for mink
	5869	6134	G	G	G	A	G	G	GTT-ATT	V1957I	2	1.36054	0	0	Unique for mink
	6002	6267	C	C	C	T	C	C	GCC-GTC	A2001V	6	4.08163	0	0	Unique for mink
	6087	6352	G	G	G	A	G	G	AAG-AAA	No change	9	6.12245	0	0	Unique for mink
	6302	6567	A	G	A	A	A	A	GAC-GGC	D2101G	1	50	0	0	Unique for dog
	6629	6894	G	G	G	T	G	G	TGT-TTT	C2210F	2	1.36054	0	0	Unique for mink
	6741	7006	C	C	C	T	C	C	ACC-ACT	No change	1	0.680272	0	0	Unique for mink
	6786	7051	C	C	C	T	C	C	TAC-TAT	No change	3	2.04082	0	0	Unique for mink
	7263	7528	C	C	C	T	C	C	GTC-GTT	No change	6	4.08163	0	0	Unique for mink
	7467	7732	C	C	C	T	C	C	TAC-TAT	No change	6	4.08163	0	0	Unique for mink
	7523	7788	C	C	C	A	C	C	GCT-GAT	A2508D	2	1.36054	0	0	Unique for mink
	8117	8382	G	G	G	T	G	G	AGT-ATT	S2706I	1	0.680272	0	0	Unique for mink
	8307	8572	G	G	G	T	G	G	TGG-TGT	W2769C	1	0.680272	0	0	Unique for mink
	8595	8860	C	C	C	T	C	C	GTC-GTT	No change	1	0.680272	0	0	Unique for mink
	9188	9453	A	A	A	G	A	A	TAT-TGT	Y3063C	1	0.680272	0	0	Unique for mink
	9226	9491	C and T	C	C	C	T	C	CAT-TAT	H3076Y	1	0.680272	2	1.33333	Present in mouse and human
	9509	9774	T	T	T	C	T	T	GTT-GCT	V3170A	1	0.680272	0	0	Unique for mink
	9605	9870	C	C	C	T	C	C	ACG-ATG	T3202M	1	0.680272	0	0	Unique for mink
	9697	9962	C and T	T	C	C	C	C	CAT-TAT	H3233Y	1	0.680272	0.0324675	0.021645	Present in dog and human
	10104	10369	C	C	C	T	C	C	CGC-CGT	No change	2	1.36054	0	0	Unique for mink
	10136	10401	C	C	C	T	C	C	GCT-GTT	A3379V	1	0.680272	0	0	Unique for mink
	10295	10560	C	C	C	T	C	C	ACT-ATT	T3432I	1	0.680272	0	0	Unique for mink
	10528	10793	G	G	G	T	G	G	GTT-TTT	V3510F	1	0.680272	0	0	Unique for mink
	10535	10800	T	T	C	T	T	T	ATA-ACA	I3512T	1	16.6667	0	0	Unique for cat
	10564	10829	A	A	A	G	A	A	ATT-GTT	I3522V	8	5.44218	0	0	Unique for mink
	10809	11074	C and T	C	C	T	C	C	TTC-TTT	No change	1	0.680272	1	0.666667	Present in mink and human
	10818	11083	G and T	G	G	T	G	G	TTG-TTT	L3606F	18	12.2449	16	10.6667	Present in mink and human
	10844	11109	C and T	C	C	T	C	C	GCT-GTT	A3615V	38	25.8503	4	2.66667	Present in mink and human
	11147	11412	C	C	C	T	C	C	ACA-ATA	T3716I	1	0.680272	0	0	Unique for mink
	11166	11431	T	T	T	C	T	T	TAT-TAC	No change	1	0.680272	0	0	Unique for mink
	11439	11704	C and T	T	C	C	C	C	TAC-TAT	No change	1	0.680272	5	3.33333	Present in dog and human
	11485	11750	C	C	C	T	C	C	CTC-TTC	L3829F	1	0.680272	0	0	Unique for mink
	11621	11886	C	C	C	T	C	C	TCA-TTA	S3874L	1	0.680272	0	0	Unique for mink
	12060	12325	C	C	C	T	C	C	GAC-GAT	No change	1	0.680272	0	0	Unique for mink
	12067	12332	G	G	G	G	A	G	GCA-ACA	A4023T	1	100	0	0	Unique for mouse
	12208	12473	C	C	C	T	C	C	CTA-TTA	No change	1	0.680272	0	0	Unique for mink
	12294	12559	C	C	C	T	C	C	ATC-ATT	No change	1	0.680272	0	0	Unique for mink
	12529	12794	G	G	G	A	G	G	GGA-AGA	G4177R	35	23.8095	0	0	Unique for mink
	12530	12795	G	G	G	A	G	G	GGA-GAA	G4177E	42	28.5714	0	0	Unique for mink
	12590	12855	C	C	C	T	C	C	CCT-CTT	P4197L	1	0.680272	0	0	Unique for mink
	12740	13005	C	C	C	T	C	C	GCT-GTT	A4247V	1	0.680272	0	0	Unique for mink
	12922	13187	A	A	A	G	A	A	ATA-GTA	I4308V	1	0.680272	0	0	Unique for mink
	13116	13381	C	C	C	T	C	C	GTC-GTT	No change	1	0.680272	0	0	Unique for mink
	13129	13394	A	A	G	A	A	A	AAA-GAA	K4377E	1	16.6667	0	0	Unique for cat
	13173	13438	T	T	T	C	T	T	CTT-CTC	No change	1	0.680272	0	0	Unique for mink
	13235	13499	C	C	C	T	C	C	ACA-ATA	T4412I	1	0.680272	0	0	Unique for mink
	13253	13517	C	C	T	C	C	C	ACT-ATT	T4418I	2	33.3333	0	0	Unique for cat
	13407	13671	C	C	C	T	C	C	TTC-TTT	No change	15	10.2041	0	0	Unique for mink
	13430	13694	C	C	C	T	C	C	ACA-ATA	T4477I	2	1.36054	0	0	Unique for mink
	13572	13836	G	G	G	A	G	G	AGG-AGA	No change	1	0.680272	0	0	Unique for mink
	13665	13929	T and C	C	T	T	T	T	TAT-TAC	No change	1	0.680272	7	4.66667	Present in dog and human
	13764	14028	G	G	G	A	G	G	ATG-ATA	M4588I	4	2.72109	0	0	Unique for mink
	13855	14119	C	C	C	T	C	C	CCA-TCA	P4619S	1	0.680272	0	0	Unique for mink
	13920	14184	C	C	C	T	C	C	ACC-ACT	No change	1	0.680272	0	0	Unique for mink
	14010	14274	G	G	G	A	G	G	GAG-GAA	No change	72	48.9796	0	0	Unique for mink
	14054	14318	C	C	C	T	C	C	ACA-ATA	T4685I	2	1.36054	0	0	Unique for mink
	14144	14408	C and T	T	T	T	C	T	CCT-CTT	P4715L	118	80.2721	85	56.6667	Present in all except the mouse
	14460	14724	C and T	T	C	C	C	C	TTC-TTT	No change	1	0.680272	10	6.66667	Present in dog and human
	14634	14898	C	C	C	T	C	C	GCC-GCT	No change	2	1.36054	0	0	Unique for mink
	15060	15324	C and T	C	T	C	C	C	AAC-AAT	No change	2	1.36054	4	2.66667	Present in cat and human
	15357	15621	T	T	T	C	T	T	CTT-CTC	No change	2	1.36054	0	0	Unique for mink
	15474	15738	C	C	C	T	C	C	TTC-TTT	No change	1	0.680272	0	0	Unique for mink
	15584	15848	C	C	C	T	C	C	ACT-ATT	T5195I	2	1.36054	0	0	Unique for mink
	16305	16569	A	A	A	C	A	A	ACA-ACC	No change	1	0.680272	0	0	Unique for mink
	16477	16741	G and T	G	G	T	G	G	GTT-TTT	V5493F	1	0.680272	1	0.666667	Present in mink and human
	16738	17002	C	C	C	T	C	C	CTC-TTC	L5580F	1	0.680272	0	0	Unique for mink
	16744	17008	A	A	A	G	A	A	ATC-GTC	I5582V	9	6.12245	0	0	Unique for mink
	16908	17172	C	C	C	T	C	C	GCC-GCT	No change	4	2.72109	0	0	Unique for mink
	16929	17193	G	G	G	A	G	G	GAG-GAA	No change	6	4.08163	0	0	Unique for mink
	17146	17410	C and T	C	C	T	C	C	CGT-TGT	R5716C	37	25.1701	4	2.66667	Present in mink and human
	17163	17427	G and T	G	G	T	G	G	GTG-GTT	No change	1	0.680272	2	1.33333	Present in mink and human
	17309	17573	C	C	C	A	C	C	GCT-GAT	A5770D	4	2.72109	0	0	Unique for mink
	17867	18131	C	C	C	T	C	C	ACT-ATT	T5956I	1	0.680272	0	0	Unique for mink
	17907	18171	C	C	C	T	C	C	GGC-GGT	No change	1	0.680272	0	0	Unique for mink
	18048	18312	C	C	C	T	C	C	GTC-GTT	No change	4	2.72109	0	0	Unique for mink
	18245	18509	T	T	T	A	T	T	CTT-CAT	L6082H	1	0.680272	0	0	Unique for mink
	18390	18654	C	C	C	T	C	C	CGC-CGT	No change	6	4.08163	0	0	Unique for mink
	18686	18950	A	G	A	A	A	A	AAG-AGG	K6229R	1	50	0	0	Unique for dog
	18847	19111	G	G	G	A	G	G	GAC-AAC	D6283N	1	0.680272	0	0	Unique for mink
	19552	19816	G	G	G	T	G	G	GTA-TTA	V6518L	1	0.680272	0	0	Unique for mink
	19581	19845	G	G	G	A	G	G	TTG-TTA	No change	4	2.72109	0	0	Unique for mink
	19630	19894	G	G	G	A	G	G	GCT-ACT	A6544T	4	2.72109	0	0	Unique for mink
	19868	20132	C	C	C	T	C	C	GCC-GTC	A6623V	1	0.680272	0	0	Unique for mink
	20674	20938	C	C	C	A	C	C	CTG-ATG	L6892M	1	0.680272	0	0	Unique for mink
	21132	21396	C	C	C	T	C	C	GAC-GAT	No change	1	0.680272	0	0	Unique for mink
										54
Spike	16	21578	G	G	G	T	G	G	GTT-TTT	V6F	1	0.680272	0	0	Unique for mink
	22	21584	T and G	G	T	T	T	T	TTG-GTG	L8V	1	50	10	6.66667	Present in dog and human
	297	21859	C	C	C	T	C	C	AAC-AAT	No change	7	4.7619	0	0	Unique for mink
	459	22021	G	G	G	T	G	G	ATG-ATT	M153I	1	0.680272	0	0	Unique for mink
	526	22088	C	C	C	T	C	C	CTT-TTT	L176F	1	0.680272	0	0	Unique for mink
	768	22330	A	A	C	A	A	A	TCA-TCC	No change	1	16.6667	0	0	Unique for cat
	770	22332	G	G	G	A	G	G	GGT-GAT	G257D	1	0.680272	0	0	Unique for mink
	782	22344	G	G	G	A	G	G	GGT-GAT	G261D	7	4.7619	0	0	Unique for mink
	784	22346	G	G	G	T	G	G	GCT-TCT	A262S	8	5.44218	0	0	Unique for mink
	1099	22661	G	G	G	T	G	G	GTC-TTC	V367F	8	5.44218	0	0	Unique for mink
	1101	22663	C	C	C	G	C	C	GTC-GTG	No change	1	0.680272	0	0	Unique for mink
	1185	22747	C	C	C	A	C	C	GTC-GTA	No change	1	0.680272	0	0	Unique for mink
	1354	22916	C	C	C	A	C	C	CTG-ATG	L452M	15	10.2041	0	0	Unique for mink
	1358	22920	A	A	A	T	A	A	TAT-TTT	Y453F	35	23.8095	0	0	Unique for mink
	1456	23018	T	T	T	C	T	T	TTT-CTT	F486L	25	17.0068	0	0	Unique for mink
	1494	23056	A	A	A	A	C	A	CAA-CAC	Q498H	1	100	0	0	Unique for mouse
	1502	23064	A	A	A	C	A	A	AAT-ACT	N501T	5	3.40136	0	0	Unique for mink
	1841	23403	A and G	A and G	G	A and G	A	G	GAT-GGT	D614G	118	75.1592	84	56	100% CAT, 50% DOG, 74.8% MINK, 100% TIGER
	1860	23422	C	C	C	T	C	C	GTC-GTT	No change	1	0.680272	0	0	Unique for mink
	2021-2035	23583-23597	-	-	-	-	15 nt deletion	-	-	-5 AA	1	100	0	0	Unique for mouse
	2121	23683	C	C	C	T	C	C	TAC-TAT	No change	1	0.680272	0	0	Unique for mink
	2260	23822	T	T	T	C	T	T	TTG-CTG	No change	1	0.680272	0	0	Unique for mink
	2495	24057	G	G	G	A	G	G	GGC-GTC	G832D	1	0.680272	0	0	Unique for mink
	2525	24087	G	G	G	A	G	G	GGT-GAT	G842D	2	1.36054	0	0	Unique for mink
	2824	24386	G	G	G	T	G	G	GCA-TCA	A942S	1	0.680272	0	0	Unique for mink
	2906	24468	A	A	A	A	G	A	AAT-AGT	N969S	1	100	0	0	Unique for mouse
	3080	24642	C	C	C	T	C	C	ACT-ATT	T1027I	1	0.680272	0	0	Unique for mink
	3300	24862	A and G	A	A	G	A	A	ACA-ACG	No change	68	46.2585	3	2	Present in mink and humans of the same clade (G) from the same country (Netherlands).
	3789	25351	A	A	A	T	A	A	CCA-CCT	No change	1	0.680272	0	0	Unique for mink
orf3a	33	25425	A	A	A	C	A	A	GGA-GGC	No change	1	0.680272	0	0	Unique for mink
	95	25487	C	C	C	T	C	C	ACT-ATT	T32I	1	0.680272	0	0	Unique for mink
	100	25492	A	A	A	G	A	A	ACG-GCG	T34A	2	1.36054	0	0	Unique for mink
	121	25513	C	C	C	T	C	C	CTC-TTC	L41F	2	1.36054	0	0	Unique for mink
	126	25518	T	T	T	C	T	T	CCT-CCC	No change	6	4.08163	0	0	Unique for mink
	163	25555	G	G	G	A	G	G	GTT-ATT	V55I	1	0.680272	0	0	Unique for mink
	171	25563	G and T	G	G	T	G	T	CAG-CAT	Q57H	39	26.5306	40	26.67	Present in mink, tiger and human
	211	25603	C and T	C	C	C	T	C	CTA-TTA	No change	1	0.680272	1	0.67	Present in mouse and human
	255	25647	G	G	G	A	G	G	TTG-TTA	No change	1	0.680272	0	0	Unique for mink
	266	25658	C	C	C	T	C	C	ACA-ATA	T89I	1	0.680272	0	0	Unique for mink
	544	25936	C	C	C	T	C	C	CAT-TAT	H182Y	33	22.449	0	0	Unique for mink
	545	25937	A	A	A	T	A	A	CAT-CTT	H182L	5	3.40136	0	0	Unique for mink
	595	25987	G	G	T	G	G	G	GAC-TAC	D199Y	1	16.6667	0	0	Unique for cat
	620	26012	T	T	T	C	T	T	TTC-TCT	F207S	1	0.680272	0	0	Unique for mink
	621	26013	C	C	C	T	C	C	TTC-TTT	No change	31	21.0884	0	0	Unique for mink
	655	26047	T	T	T	G	T	T	TTG-GTG	L219V	38	25.8503	0	0	Unique for mink
	670	26062	G	G	G	T	G	G	GGT-TGT	G224C	4	2.72109	0	0	Unique for mink
	684	26076	T	T	T	C	T	T	GTT-GTC	No change	2	1.36054	0	0	Unique for mink
	686	26078	C	C	C	T	C	C	ACC-ATC	T229I	24	16.3265	0	0	Unique for mink
	752	26144	G and T	T	G	G	G	G	GGT-GTT	G251V	1	50	22	14.67	Present in dog and human
Matrix	8	26530	A and G	A	A	G	A	A	GAT-GGT	D3G	4	2.72109	1	0.67	Present in mink and human
	123	26645	C	C	C	T	C	C	AAC-AAT	No change	5	3.40136	0	0	Unique for mink
	208	26730	G	G	G	T	G	G	GTT-TTT	V70F	1	0.680272	0	0	Unique for mink
	213	26735	C and T	C	C	T	C	C	TAC-TAT	No change	6	4.08163	1	0.67	Present in mink and human
	262	26784	G	G	G	A	G	G	GTA-ATA	V88I	1	0.680272	0	0	Unique for mink
	373	26895	C	C	C	T	C	C	CAT-TAT	H125Y	2	1.36054	0	0	Unique for mink
	396	26918	G	G	G	A	G	G	CCG-CCA	No change	1	0.680272	0	0	Unique for mink
	524	27046	C	C	T	C	C	C	ACG-ATG	T175M	1	16.67	0	0	Unique for cat
orf6	60	27261	G	G	G	T	G	G	AGG-AGT	R20S	15	10.2041	0	0	Unique for mink
	68	27269	A	A	A	G	A	A	AAA-AGT	K23S	3	2.04082	0	0	Unique for mink
	69	27270	A	A	A	T	A	A			3	2.04082	0	0	Unique for mink
orf7a	113	27506	G	G	G	A	G	G	GGA-GAA	G38E	1	0.68	0	0	Unique for mink	NB: There was two mink isolates with 134 nucleotide deletion. The effects on the amino acid sequence were the deletion of 45 amino acid residues. The two isolates were identical for the orf7a gene (hCoV-19/mink/Netherlands/NB01_01KS/2020|EPI_ISL_447623|2020-04-29|G and hCoV-19/mink/Netherlands/NB-EMC-1-1/2020|EPI_ISL_522991|2020-04-28|G)
	134	27527	C	C	Cat	T	C	C	CCA-CTA	P45L	1	0.68	0	0	Unique for mink
	148-281	27541-27674				134 nt deletion				-45	2	1.36	0	0	Unique for mink
orf7b	102	27857	G	G	G	T	G	G	CTG-CTT	No change	1	0.68	0	0	Unique for mink
orf8	184	28077	G	G	G	T	G	G	GTG-TTG	V62L	1	0.68	0	0	Unique for mink
	340	28233	G	G	G	A	G	G	GTT-ATT	V114I	2	1.36	0	0	Unique for mink
	344	28237	G	G	G	A	G	G	CGT-CAT	R115H	1	0.68	0	0	Unique for mink
Nucleocapsid	11	28284	A	A	A	C	A	A	AAT-ACT	N4T	1	0.680272	0	0	Unique for mink
	39	28312	C	C	T	C	C	C	CCC-CCT	No change	1	0.680272	0	0	Unique for cat
	122	28395	G	G	G	T	G	G	CGG-CTG	R41L	4	2.72109	0	0	Unique for mink
	177	28450	T	T	T	C	T	T	CAT-CAC	No change	1	0.680272	0	0	Unique for mink
	180	28453	C	C	C	T	C	C	GGC-GGT	No change	1	0.680272	0	0	Unique for mink
	198	28471	C	C	C	T	C	C	TTC-TTT	No change	5	3.40136	0	0	Unique for mink
	239	28512	C	C	C	T	C	C	CCA-CTA	P80L	4	2.72109	0	0	Unique for mink
	262	28535	C	C	C	A	C	C	CGA-AGA	No change	15	10.2041	0	0	Unique for mink
	553	28826	C	C	C	T	C	C	CGT-TGT	R185C	1	0.680272	0	0	Unique for mink
	581	28854	C	C	C	T	C	C	TCA-TTA	S194L	1	0.680272	0	0	Unique for mink
	596	28869	C	C	C	A	C	C	CCA-CAA	P199Q	4	2.72109	0	0	Unique for mink
	608	28881	G and A	A	A	G	G	G	AGG-AAA	R203K	4	2.72109	17	11.33	Present in dog, cat, and human	3 FOR CAT, 1 FOR DOG
	609	28882	G and A	A	A	G	G	G			4	2.72109	17	11.33	Present in dog, cat, and human
	610	28883	G and C	C	C	G	G	G	GGA-CGA	G204R	4	2.72109	17	11.33	Present in dog, cat, and human
	630	28903	G	G	G	T	G	G	ATG-ATT	M210I	1	0.680272	0	0	Unique for mink
	663	28936	G	G	G	T	G	G	TTG-TTT	L221F	1	0.680272	0	0	Unique for mink
	740	29013	C	C	T	C	C	C	ACT-ATT	T247I	1	0.680272	0	0	Unique for cat
	980	29253	C	C	C	T	C	C	TCG-TTG	S327L	1	0.680272	0	0	Unique for mink
	1021	29294	G	G	G	T	G	G	GAC-TAC	D341Y	1	0.680272	0	0	Unique for mink
	1136	29409	C	C	C	T	C	C	ACT-ATT	T379I	1	0.680272	0	0	Unique for mink
	1227	29500	A	A	A	G	A	A	CAA-CAG	No change	23	15.6463	0	0	Unique for mink
	1230	29503	C	C	C	T	C	C	TCC-TCT	No change	1	0.680272	0	0	Unique for mink
