# Supplementary material for: Mutational spectra of SARS-CoV-2 isolated from animals
Source: PeerJ. 2020 Dec 18;8:e10609. doi: 10.7717/peerj.10609 (PMC7751428; doi:10.7717/peerj.10609)
Supplement: Supplemental Information 3 [file peerj-08-10609-s003.xlsx]

## Sheet: Genetic distance
Supplementary Table 3: Pairwise genetic distances for SARS-CoV-2 isolates from animals, humans, reference, bat coronavirus RaTG13, and pangolin coronavirus (MT121216.1)
	hCoV-19/mink/Netherlands/NB-EMC-21-19/2020|EPI_ISL_523065|2020-07-09|G	hCoV-19/mink/Netherlands/NB-EMC-21-2/2020|EPI_ISL_523066|2020-07-09|G	hCoV-19/mink/Netherlands/NB-EMC-16-10/2020|EPI_ISL_523030|2020-06-21|G	hCoV-19/mink/Netherlands/NB-EMC-13-4/2020|EPI_ISL_523014|2020-06-14|G	hCoV-19/mink/Netherlands/NB-EMC-20-27/2020|EPI_ISL_523056|2020-07-09|G	hCoV-19/Netherlands/NA_296/2020|EPI_ISL_422605|2020-04-01|G	hCoV-19/Netherlands/NA_316/2020|EPI_ISL_422625|2020-04-02|G	hCoV-19/Netherlands/NA_456/2020|EPI_ISL_455258|2020-04-01|G	hCoV-19/Felis_catus/Belgium/BE-MG-0320/2020|EPI_ISL_487275|2020-03-11|G	hCoV-19/France/GE8802/2020|EPI_ISL_560630|2020-04-14|G	hCoV-19/France/GE8804/2020|EPI_ISL_560631|2020-04-16|G	hCoV-19/canine/Hong_Kong/20-03695/2020|EPI_ISL_450403|2020-03-18|GR	hCoV-19/Hong_Kong/HKU-200723-079/2020|EPI_ISL_497846|2020-03-20|GR	hCoV-19/Hong_Kong/HKU-200723-078/2020|EPI_ISL_497845|2020-03-16|GR	hCoV-19/England/GSTT-5203/2020|EPI_ISL_560661|2020-03-19|GR	hCoV-19/mouse/Harbin/HRB-26m/2020|EPI_ISL_459910|2020-04-19|L	hCoV-19/tiger/USA/NY-040420/2020|EPI_ISL_420293|2020-04-02|GH	hCoV-19/USA/NY-NYUMC637/2020|EPI_ISL_444754|2020-04-02|GH	hCoV-19/USA/NY-NYUMC888/2020|EPI_ISL_467381|2020-04-03|GH	hCoV-19/USA/NY-NYUMC640/2020|EPI_ISL_444757|2020-04-03|GH	hCoV-19/mink/Netherlands/NB-EMC-7-19/2020|EPI_ISL_523109|2020-05-30|GH	hCoV-19/mink/Netherlands/NB-EMC-7-3/2020|EPI_ISL_523111|2020-05-30|GH	hCoV-19/mink/Netherlands/NB-EMC-7-10/2020|EPI_ISL_523108|2020-05-30|GH	hCoV-19/Netherlands/NA_301/2020|EPI_ISL_422610|2020-04-01|GH	hCoV-19/Netherlands/NA_685/2020|EPI_ISL_461120|2020-04-05|GH	hCoV-19/Netherlands/Gelderland_16/2020|EPI_ISL_460652|2020-04-03|GH	hCoV-19/Harbin/HRB-26/2020|EPI_ISL_459909|2020-03-02|L	hCoV-19/mink/Netherlands/NB02_13KS/2020|EPI_ISL_447630|2020-04-29|L	hCoV-19/mink/Netherlands/NB02_07KS/2020|EPI_ISL_447629|2020-04-29|L	hCoV-19/mink/Netherlands/NB02_16RS/2020|EPI_ISL_447632|2020-04-28|L	hCoV-19/Netherlands/Gelderland_34/2020|EPI_ISL_460934|2020-04-12|L	hCoV-19/Netherlands/NoordBrabant_10045/2020|EPI_ISL_454794|2020-04-07|L	NC_045512.2_|Severe_acute_respiratory_syndrome_coronavirus_2_isolate_Wuhan-Hu-1_complete_genome	hCoV-19/cat/France/Env-Ba/2020|EPI_ISL_483063|2020-05-14|GR	hCoV-19/cat/France/Env-Di/2020|EPI_ISL_483064|2020-05-14|GR	hCoV-19/Spain/CT-ISCIII-2012573/2020|EPI_ISL_539540|2020-05-21|GR	hCoV-19/France/CVL8278/2020|EPI_ISL_560574|2020-03-25|GR	hCoV-19/France/CVL8280/2020|EPI_ISL_560575|2020-04-07|GR	hCoV-19/France/CVL8294/2020|EPI_ISL_560579|2020-04-07|GR	hCoV-19/Belgium/ULG-10223/2020|EPI_ISL_498129|2020-05-15|GR	MN996532.2 (Bat RaTG13)	MT121216.1 (Pangolin)
hCoV-19/mink/Netherlands/NB-EMC-21-19/2020|EPI_ISL_523065|2020-07-09|G
hCoV-19/mink/Netherlands/NB-EMC-21-2/2020|EPI_ISL_523066|2020-07-09|G	6.72565e-05
hCoV-19/mink/Netherlands/NB-EMC-16-10/2020|EPI_ISL_523030|2020-06-21|G	0.000269263	0.000269258
hCoV-19/mink/Netherlands/NB-EMC-13-4/2020|EPI_ISL_523014|2020-06-14|G	0.000201805	0.000201801	0.000201909
hCoV-19/mink/Netherlands/NB-EMC-20-27/2020|EPI_ISL_523056|2020-07-09|G	0.000201805	0.000201801	0.000201909	0.000134511
hCoV-19/Netherlands/NA_296/2020|EPI_ISL_422605|2020-04-01|G	0.000370013	0.000370006	0.000370203	0.00030268	0.00030268
hCoV-19/Netherlands/NA_316/2020|EPI_ISL_422625|2020-04-02|G	0.000370013	0.000370006	0.000370203	0.00030268	0.00030268	0
hCoV-19/Netherlands/NA_456/2020|EPI_ISL_455258|2020-04-01|G	0.00033637	0.000336364	0.000336543	0.000269044	0.000269044	3.36236e-05	3.36236e-05
hCoV-19/Felis_catus/Belgium/BE-MG-0320/2020|EPI_ISL_487275|2020-03-11|G	0.000403665	0.000403658	0.000403873	0.000336323	0.000336323	0.000100876	0.000100876	6.72497e-05
hCoV-19/France/GE8802/2020|EPI_ISL_560630|2020-04-14|G	0.000437327	0.000437318	0.000437552	0.000369975	0.000369975	0.000134509	0.000134509	0.00010088	3.36248e-05
hCoV-19/France/GE8804/2020|EPI_ISL_560631|2020-04-16|G	0.000470959	0.000470949	0.0004712	0.000403601	0.000403601	0.000168133	0.000168133	0.000134504	6.72484e-05	0.000100878
hCoV-19/canine/Hong_Kong/20-03695/2020|EPI_ISL_450403|2020-03-18|GR	0.000470994	0.000470984	0.000471236	0.000403631	0.000403631	0.000168145	0.000168145	0.000134514	0.000134511	0.000168148	0.000201773
hCoV-19/Hong_Kong/HKU-200723-079/2020|EPI_ISL_497846|2020-03-20|GR	0.000504644	0.000504635	0.000504904	0.000437274	0.000437274	0.000201777	0.000201777	0.000168145	0.000168142	0.000201781	0.000235406	3.36236e-05
hCoV-19/Hong_Kong/HKU-200723-078/2020|EPI_ISL_497845|2020-03-16|GR	0.000470994	0.000470984	0.000471236	0.000403631	0.000403631	0.000168145	0.000168145	0.000134514	0.000134511	0.000168148	0.000201773	0	3.36236e-05
hCoV-19/England/GSTT-5203/2020|EPI_ISL_560661|2020-03-19|GR	0.000471025	0.000471016	0.000471267	0.000403658	0.000403658	0.000168156	0.000168156	0.000134523	0.00013452	0.000168159	0.000201787	0	3.36259e-05	0
hCoV-19/mouse/Harbin/HRB-26m/2020|EPI_ISL_459910|2020-04-19|L	0.000706943	0.000706929	0.000707306	0.000639492	0.000639492	0.000403806	0.000403806	0.00037015	0.000370142	0.000403813	0.000437455	0.000437488	0.000471149	0.000437488	0.000437518
hCoV-19/tiger/USA/NY-040420/2020|EPI_ISL_420293|2020-04-02|GH	0.000437327	0.000437318	0.000437552	0.000369975	0.000369975	0.000134509	0.000134509	0.00010088	0.000100878	0.000134511	0.000168135	0.000168148	0.000201781	0.000168148	0.000168159	0.000403813
hCoV-19/USA/NY-NYUMC637/2020|EPI_ISL_444754|2020-04-02|GH	0.000470975	0.000470966	0.000471217	0.000403615	0.000403615	0.000168138	0.000168138	0.000134509	0.000134506	0.000168141	0.000201766	0.000201781	0.000235415	0.000201781	0.000201794	0.000437471	3.36236e-05
hCoV-19/USA/NY-NYUMC888/2020|EPI_ISL_467381|2020-04-03|GH	0.000470992	0.000470983	0.000471234	0.00040363	0.00040363	0.000168144	0.000168144	0.000134513	0.000134511	0.000168147	0.000201773	0.000201788	0.000235423	0.000201788	0.000201801	0.000437486	3.36248e-05	6.72508e-05
hCoV-19/USA/NY-NYUMC640/2020|EPI_ISL_444757|2020-04-03|GH	0.000504625	0.000504615	0.000504884	0.000437257	0.000437257	0.00020177	0.00020177	0.000168138	0.000168135	0.000201773	0.000235397	0.000235415	0.00026905	0.000235415	0.00023543	0.00047113	6.72484e-05	0.000100874	0.000100878
hCoV-19/mink/Netherlands/NB-EMC-7-19/2020|EPI_ISL_523109|2020-05-30|GH	0.000639269	0.000639256	0.000639597	0.000571867	0.000571867	0.000336323	0.000336323	0.000302686	0.00030268	0.000336329	0.000369954	0.000369982	0.000403623	0.000369982	0.000370007	0.000605812	0.000269035	0.000302669	0.00030268	0.000336305
hCoV-19/mink/Netherlands/NB-EMC-7-3/2020|EPI_ISL_523111|2020-05-30|GH	0.000639269	0.000639256	0.000639597	0.000571867	0.000571867	0.000336323	0.000336323	0.000302686	0.00030268	0.000336329	0.000369954	0.000369982	0.000403623	0.000369982	0.000370007	0.000605812	0.000269035	0.000302669	0.00030268	0.000336305	0
hCoV-19/mink/Netherlands/NB-EMC-7-10/2020|EPI_ISL_523108|2020-05-30|GH	0.000672938	0.000672925	0.000673284	0.000605528	0.000605528	0.000369969	0.000369969	0.00033633	0.000336323	0.000369975	0.000403601	0.000403631	0.000437274	0.000403631	0.000403658	0.000639492	0.000302675	0.000336311	0.000336323	0.000369948	3.36243e-05	3.36243e-05
hCoV-19/Netherlands/NA_301/2020|EPI_ISL_422610|2020-04-01|GH	0.000504643	0.000504633	0.000504902	0.000437273	0.000437273	0.000201777	0.000201777	0.000168144	0.000168141	0.00020178	0.000235405	0.000235423	0.000269059	0.000235423	0.000235439	0.000471147	0.000134506	0.000168135	0.000168141	0.000201766	0.000201777	0.000201777	0.000235415
hCoV-19/Netherlands/NA_685/2020|EPI_ISL_461120|2020-04-05|GH	0.000504625	0.000504615	0.000504884	0.000437257	0.000437257	0.00020177	0.00020177	0.000168138	0.000168135	0.000201773	0.000235397	0.000235415	0.00026905	0.000235415	0.00023543	0.00047113	0.000134501	0.000168129	0.000168135	0.000201758	0.00020177	0.00020177	0.000235406	6.72508e-05
hCoV-19/Netherlands/Gelderland_16/2020|EPI_ISL_460652|2020-04-03|GH	0.000571927	0.000571916	0.000572221	0.000504544	0.000504544	0.000269035	0.000269035	0.000235402	0.000235397	0.000269039	0.000302663	0.000302686	0.000336323	0.000302686	0.000302706	0.000538452	0.000134501	0.000168129	0.000168135	0.000201758	0.000403579	0.000403579	0.000437226	0.00026903	0.00026902
hCoV-19/Harbin/HRB-26/2020|EPI_ISL_459909|2020-03-02|L	0.000571918	0.000571906	0.000572211	0.000504536	0.000504536	0.000269031	0.000269031	0.000235398	0.000235393	0.000269035	0.000302658	0.000302681	0.000336318	0.000302681	0.000302701	0.000134579	0.000269035	0.000302669	0.00030268	0.000336305	0.000470883	0.000470883	0.000504536	0.000336317	0.000336305	0.000403579
hCoV-19/mink/Netherlands/NB02_13KS/2020|EPI_ISL_447630|2020-04-29|L	0.000605652	0.000605641	0.000605944	0.000605579	0.000605579	0.00037	0.00037	0.000336358	0.000336352	0.000370006	0.000403635	0.000403665	0.000437311	0.000403665	0.000403693	0.0003702	0.000370006	0.00040365	0.000403664	0.000437294	0.000571916	0.000571916	0.000605579	0.00043731	0.000437294	0.000504587	0.00023543
hCoV-19/mink/Netherlands/NB02_07KS/2020|EPI_ISL_447629|2020-04-29|L	0.000605631	0.000605619	0.000673317	0.000605558	0.000605558	0.000369987	0.000369987	0.000336346	0.00033634	0.000369993	0.000403621	0.000403651	0.000437296	0.000403651	0.000403678	0.000370187	0.000369993	0.000403635	0.00040365	0.000437279	0.000571895	0.000571895	0.000605558	0.000437294	0.000437279	0.000504569	0.000235422	0.000134525
hCoV-19/mink/Netherlands/NB02_16RS/2020|EPI_ISL_447632|2020-04-28|L	0.000773983	0.000773968	0.000774356	0.00077389	0.00077389	0.000538247	0.000538247	0.000504599	0.000504589	0.000538256	0.000571886	0.000571929	0.000605582	0.000571929	0.000571967	0.000538538	0.000538256	0.000571906	0.000571927	0.000605558	0.000740216	0.000740216	0.00077389	0.000605579	0.000605558	0.000672864	0.000403643	0.000168153	0.000302717
hCoV-19/Netherlands/Gelderland_34/2020|EPI_ISL_460934|2020-04-12|L	0.000571975	0.000571964	0.000572269	0.000504587	0.000504587	0.000269058	0.000269058	0.000235422	0.000235417	0.000269062	0.000302689	0.000302712	0.000336352	0.000302712	0.000302732	0.000269203	0.000269062	0.0003027	0.00030271	0.000336339	0.000470931	0.000470931	0.000504587	0.000336351	0.000336339	0.00040362	0.000134515	0.000100892	0.000100888	0.000269078
hCoV-19/Netherlands/NoordBrabant_10045/2020|EPI_ISL_454794|2020-04-07|L	0.000571975	0.000571964	0.000572269	0.000504587	0.000504587	0.000269058	0.000269058	0.000235422	0.000235417	0.000269062	0.000302689	0.000302712	0.000336352	0.000302712	0.000302732	0.000269203	0.000269062	0.0003027	0.00030271	0.000336339	0.000470931	0.000470931	0.000504587	0.000336351	0.000336339	0.00040362	0.000134515	0.000100892	0.000100888	0.000269078	0
NC_045512.2_|Severe_acute_respiratory_syndrome_coronavirus_2_isolate_Wuhan-Hu-1_complete_genome	0.000504617	0.000504607	0.000504876	0.00043725	0.00043725	0.000201766	0.000201766	0.000168136	0.000168133	0.00020177	0.000235393	0.000235411	0.000269045	0.000235411	0.000235427	0.000201875	0.00020177	0.000235402	0.00023541	0.000269035	0.000403601	0.000403601	0.00043725	0.000269044	0.000269035	0.000336305	6.72484e-05	0.000168159	0.000168153	0.000336358	6.72552e-05	6.72552e-05
hCoV-19/cat/France/Env-Ba/2020|EPI_ISL_483063|2020-05-14|GR	0.000605637	0.000605625	0.000605948	0.00053824	0.00053824	0.000302698	0.000302698	0.00026906	0.000269055	0.000302703	0.00033633	0.000134509	0.000168138	0.000134509	0.000134518	0.000572169	0.000302703	0.000336342	0.000336354	0.000369982	0.000504582	0.000504582	0.00053824	0.000369995	0.000369982	0.000437266	0.000437259	0.000538286	0.000538267	0.000706586	0.000437303	0.000437303	0.000369976
hCoV-19/cat/France/Env-Di/2020|EPI_ISL_483064|2020-05-14|GR	0.000605637	0.000605625	0.000605948	0.00053824	0.00053824	0.000302698	0.000302698	0.00026906	0.000269055	0.000302703	0.00033633	0.000134509	0.000168138	0.000134509	0.000134518	0.000572169	0.000302703	0.000336342	0.000336354	0.000369982	0.000504582	0.000504582	0.00053824	0.000369995	0.000369982	0.000437266	0.000437259	0.000538286	0.000538267	0.000706586	0.000437303	0.000437303	0.000369976	0
hCoV-19/Spain/CT-ISCIII-2012573/2020|EPI_ISL_539540|2020-05-21|GR	0.000538296	0.000538286	0.000538573	0.000470919	0.000470919	0.000235411	0.000235411	0.000201777	0.000201773	0.000235415	0.00026904	6.72484e-05	0.000100874	6.72484e-05	6.72529e-05	0.000504811	0.000235415	0.00026905	0.000269059	0.000302686	0.000437266	0.000437266	0.000470919	0.000302697	0.000302686	0.000369962	0.000369956	0.000470959	0.000470942	0.000639236	0.000369993	0.000369993	0.000302681	0.00020177	0.00020177
hCoV-19/France/CVL8278/2020|EPI_ISL_560574|2020-03-25|GR	0.000605637	0.000605625	0.000605948	0.00053824	0.00053824	0.000302698	0.000302698	0.00026906	0.000269055	0.000302703	0.00033633	0.000134509	0.000168138	0.000134509	0.000134518	0.000572169	0.000302703	0.000336342	0.000336354	0.000369982	0.000470935	0.000470935	0.000504592	0.000369995	0.000369982	0.000437266	0.000437259	0.000538286	0.000538267	0.000706586	0.000437303	0.000437303	0.000369976	0.00026905	0.00026905	0.00020177
hCoV-19/France/CVL8280/2020|EPI_ISL_560575|2020-04-07|GR	0.000672975	0.000672962	0.000673321	0.000605561	0.000605561	0.000369989	0.000369989	0.000336348	0.000336342	0.000369995	0.000403623	0.000201777	0.00023541	0.000201777	0.00020179	0.000639527	0.000369995	0.000403638	0.000403652	0.000437281	0.000538249	0.000538249	0.00057191	0.000437297	0.000437281	0.000504572	0.000504564	0.000605613	0.000605591	0.000773933	0.000504615	0.000504615	0.000437274	0.000336335	0.000336335	0.000269044	6.72508e-05
hCoV-19/France/CVL8294/2020|EPI_ISL_560579|2020-04-07|GR	0.000672965	0.000672952	0.00067331	0.000605552	0.000605552	0.000369983	0.000369983	0.000336343	0.000336336	0.000369989	0.000403617	0.000201773	0.000235406	0.000201773	0.000201787	0.000639517	0.000369989	0.000403631	0.000403645	0.000437274	0.00053824	0.00053824	0.000571901	0.00043729	0.000437274	0.000504564	0.000504556	0.000605603	0.000605582	0.00077392	0.000504607	0.000504607	0.000437267	0.00033633	0.00033633	0.00026904	6.72497e-05	0.000134509
hCoV-19/Belgium/ULG-10223/2020|EPI_ISL_498129|2020-05-15|GR	0.000605603	0.000605591	0.000605914	0.00053821	0.00053821	0.000302681	0.000302681	0.000269045	0.00026904	0.000302686	0.000336311	0.000134501	0.000168129	0.000134501	0.00013451	0.000572137	0.000302686	0.000336323	0.000336335	0.000369962	0.000504554	0.000504554	0.00053821	0.000369975	0.000369962	0.000437242	0.000437235	0.000538256	0.000538237	0.000706547	0.000437279	0.000437279	0.000369956	0.000269035	0.000269035	0.000201758	0.000269035	0.000336317	0.000336311
MN996532.2 (Bat coronavirus RaTG13)	0.0397177	0.0397169	0.039775	0.0396766	0.0396059	0.0394253	0.0394253	0.0393899	0.0393891	0.039426	0.0393184	0.0394629	0.0394983	0.0394629	0.0394657	0.0393374	0.0393898	0.0394252	0.0394266	0.0394605	0.0395335	0.0395335	0.0395697	0.0393913	0.0393898	0.0395312	0.039353	0.0394662	0.039394	0.0395723	0.0393571	0.0393571	0.0392823	0.0396067	0.0396067	0.0395337	0.0396067	0.0396789	0.0396782	0.0396044
MT121216.1 (Pangolin)	0.107346	0.107344	0.107458	0.107378	0.107299	0.107135	0.107135	0.107096	0.107177	0.10722	0.107098	0.107264	0.107304	0.107264	0.107273	0.106997	0.107179	0.107218	0.107222	0.107257	0.107183	0.107183	0.107225	0.107183	0.107179	0.107297	0.106978	0.107196	0.107191	0.107355	0.107068	0.107068	0.106978	0.107429	0.107429	0.107343	0.107385	0.107468	0.107466	0.107343	0.107766

## Sheet: Identity percent
	hCoV-19/mink/Netherlands/NB-EMC-21-19/2020|EPI_ISL_523065|2020-07-09|G	hCoV-19/mink/Netherlands/NB-EMC-21-2/2020|EPI_ISL_523066|2020-07-09|G	hCoV-19/mink/Netherlands/NB-EMC-16-10/2020|EPI_ISL_523030|2020-06-21|G	hCoV-19/mink/Netherlands/NB-EMC-13-4/2020|EPI_ISL_523014|2020-06-14|G	hCoV-19/mink/Netherlands/NB-EMC-20-27/2020|EPI_ISL_523056|2020-07-09|G	hCoV-19/Netherlands/NA_296/2020|EPI_ISL_422605|2020-04-01|G	hCoV-19/Netherlands/NA_316/2020|EPI_ISL_422625|2020-04-02|G	hCoV-19/Netherlands/NA_456/2020|EPI_ISL_455258|2020-04-01|G	hCoV-19/Felis_catus/Belgium/BE-MG-0320/2020|EPI_ISL_487275|2020-03-11|G	hCoV-19/France/GE8802/2020|EPI_ISL_560630|2020-04-14|G	hCoV-19/France/GE8804/2020|EPI_ISL_560631|2020-04-16|G	hCoV-19/canine/Hong_Kong/20-03695/2020|EPI_ISL_450403|2020-03-18|GR	hCoV-19/Hong_Kong/HKU-200723-079/2020|EPI_ISL_497846|2020-03-20|GR	hCoV-19/Hong_Kong/HKU-200723-078/2020|EPI_ISL_497845|2020-03-16|GR	hCoV-19/England/GSTT-5203/2020|EPI_ISL_560661|2020-03-19|GR	hCoV-19/mouse/Harbin/HRB-26m/2020|EPI_ISL_459910|2020-04-19|L	hCoV-19/tiger/USA/NY-040420/2020|EPI_ISL_420293|2020-04-02|GH	hCoV-19/USA/NY-NYUMC637/2020|EPI_ISL_444754|2020-04-02|GH	hCoV-19/USA/NY-NYUMC888/2020|EPI_ISL_467381|2020-04-03|GH	hCoV-19/USA/NY-NYUMC640/2020|EPI_ISL_444757|2020-04-03|GH	hCoV-19/mink/Netherlands/NB-EMC-7-19/2020|EPI_ISL_523109|2020-05-30|GH	hCoV-19/mink/Netherlands/NB-EMC-7-3/2020|EPI_ISL_523111|2020-05-30|GH	hCoV-19/mink/Netherlands/NB-EMC-7-10/2020|EPI_ISL_523108|2020-05-30|GH	hCoV-19/Netherlands/NA_301/2020|EPI_ISL_422610|2020-04-01|GH	hCoV-19/Netherlands/NA_685/2020|EPI_ISL_461120|2020-04-05|GH	hCoV-19/Netherlands/Gelderland_16/2020|EPI_ISL_460652|2020-04-03|GH	hCoV-19/Harbin/HRB-26/2020|EPI_ISL_459909|2020-03-02|L	hCoV-19/mink/Netherlands/NB02_13KS/2020|EPI_ISL_447630|2020-04-29|L	hCoV-19/mink/Netherlands/NB02_07KS/2020|EPI_ISL_447629|2020-04-29|L	hCoV-19/mink/Netherlands/NB02_16RS/2020|EPI_ISL_447632|2020-04-28|L	hCoV-19/Netherlands/Gelderland_34/2020|EPI_ISL_460934|2020-04-12|L	hCoV-19/Netherlands/NoordBrabant_10045/2020|EPI_ISL_454794|2020-04-07|L	NC_045512.2_|Severe_acute_respiratory_syndrome_coronavirus_2_isolate_Wuhan-Hu-1_complete_genome	hCoV-19/cat/France/Env-Ba/2020|EPI_ISL_483063|2020-05-14|GR	hCoV-19/cat/France/Env-Di/2020|EPI_ISL_483064|2020-05-14|GR	hCoV-19/Spain/CT-ISCIII-2012573/2020|EPI_ISL_539540|2020-05-21|GR	hCoV-19/France/CVL8278/2020|EPI_ISL_560574|2020-03-25|GR	hCoV-19/France/CVL8280/2020|EPI_ISL_560575|2020-04-07|GR	hCoV-19/France/CVL8294/2020|EPI_ISL_560579|2020-04-07|GR	hCoV-19/Belgium/ULG-10223/2020|EPI_ISL_498129|2020-05-15|GR	MN996532.2 (Bat RaTG13)	MT121216.1 (Pangolin)
hCoV-19/mink/Netherlands/NB-EMC-21-19/2020|EPI_ISL_523065|2020-07-09|G
hCoV-19/mink/Netherlands/NB-EMC-21-2/2020|EPI_ISL_523066|2020-07-09|G	99.9933
hCoV-19/mink/Netherlands/NB-EMC-16-10/2020|EPI_ISL_523030|2020-06-21|G	99.9731	99.9731
hCoV-19/mink/Netherlands/NB-EMC-13-4/2020|EPI_ISL_523014|2020-06-14|G	99.9798	99.9798	99.9798
hCoV-19/mink/Netherlands/NB-EMC-20-27/2020|EPI_ISL_523056|2020-07-09|G	99.9798	99.9798	99.9798	99.9865
hCoV-19/Netherlands/NA_296/2020|EPI_ISL_422605|2020-04-01|G	99.963	99.963	99.963	99.9697	99.9697
hCoV-19/Netherlands/NA_316/2020|EPI_ISL_422625|2020-04-02|G	99.963	99.963	99.963	99.9697	99.9697	100
hCoV-19/Netherlands/NA_456/2020|EPI_ISL_455258|2020-04-01|G	99.9664	99.9664	99.9663	99.9731	99.9731	99.9966	99.9966
hCoV-19/Felis_catus/Belgium/BE-MG-0320/2020|EPI_ISL_487275|2020-03-11|G	99.9596	99.9596	99.9596	99.9664	99.9664	99.9899	99.9899	99.9933
hCoV-19/France/GE8802/2020|EPI_ISL_560630|2020-04-14|G	99.9563	99.9563	99.9562	99.963	99.963	99.9865	99.9865	99.9899	99.9966
hCoV-19/France/GE8804/2020|EPI_ISL_560631|2020-04-16|G	99.9529	99.9529	99.9529	99.9596	99.9596	99.9832	99.9832	99.9865	99.9933	99.9899
hCoV-19/canine/Hong_Kong/20-03695/2020|EPI_ISL_450403|2020-03-18|GR	99.9529	99.9529	99.9529	99.9596	99.9596	99.9832	99.9832	99.9865	99.9865	99.9832	99.9798
hCoV-19/Hong_Kong/HKU-200723-079/2020|EPI_ISL_497846|2020-03-20|GR	99.9495	99.9495	99.9495	99.9563	99.9563	99.9798	99.9798	99.9832	99.9832	99.9798	99.9765	99.9966
hCoV-19/Hong_Kong/HKU-200723-078/2020|EPI_ISL_497845|2020-03-16|GR	99.9529	99.9529	99.9529	99.9596	99.9596	99.9832	99.9832	99.9865	99.9865	99.9832	99.9798	100	99.9966
hCoV-19/England/GSTT-5203/2020|EPI_ISL_560661|2020-03-19|GR	99.9529	99.9529	99.9529	99.9596	99.9596	99.9832	99.9832	99.9865	99.9865	99.9832	99.9798	100	99.9966	100
hCoV-19/mouse/Harbin/HRB-26m/2020|EPI_ISL_459910|2020-04-19|L	99.9293	99.9293	99.9293	99.9361	99.9361	99.9596	99.9596	99.963	99.963	99.9596	99.9563	99.9563	99.9529	99.9563	99.9562
hCoV-19/tiger/USA/NY-040420/2020|EPI_ISL_420293|2020-04-02|GH	99.9563	99.9563	99.9562	99.963	99.963	99.9865	99.9865	99.9899	99.9899	99.9865	99.9832	99.9832	99.9798	99.9832	99.9832	99.9596
hCoV-19/USA/NY-NYUMC637/2020|EPI_ISL_444754|2020-04-02|GH	99.9529	99.9529	99.9529	99.9596	99.9596	99.9832	99.9832	99.9865	99.9865	99.9832	99.9798	99.9798	99.9765	99.9798	99.9798	99.9563	99.9966
hCoV-19/USA/NY-NYUMC888/2020|EPI_ISL_467381|2020-04-03|GH	99.9529	99.9529	99.9529	99.9596	99.9596	99.9832	99.9832	99.9865	99.9865	99.9832	99.9798	99.9798	99.9765	99.9798	99.9798	99.9563	99.9966	99.9933
hCoV-19/USA/NY-NYUMC640/2020|EPI_ISL_444757|2020-04-03|GH	99.9495	99.9495	99.9495	99.9563	99.9563	99.9798	99.9798	99.9832	99.9832	99.9798	99.9765	99.9765	99.9731	99.9765	99.9765	99.9529	99.9933	99.9899	99.9899
hCoV-19/mink/Netherlands/NB-EMC-7-19/2020|EPI_ISL_523109|2020-05-30|GH	99.9361	99.9361	99.936	99.9428	99.9428	99.9664	99.9664	99.9697	99.9697	99.9664	99.963	99.963	99.9596	99.963	99.963	99.9394	99.9731	99.9697	99.9697	99.9664
hCoV-19/mink/Netherlands/NB-EMC-7-3/2020|EPI_ISL_523111|2020-05-30|GH	99.9361	99.9361	99.936	99.9428	99.9428	99.9664	99.9664	99.9697	99.9697	99.9664	99.963	99.963	99.9596	99.963	99.963	99.9394	99.9731	99.9697	99.9697	99.9664	100
hCoV-19/mink/Netherlands/NB-EMC-7-10/2020|EPI_ISL_523108|2020-05-30|GH	99.9327	99.9327	99.9327	99.9394	99.9394	99.963	99.963	99.9664	99.9664	99.963	99.9596	99.9596	99.9563	99.9596	99.9596	99.9361	99.9697	99.9664	99.9664	99.963	99.9966	99.9966
hCoV-19/Netherlands/NA_301/2020|EPI_ISL_422610|2020-04-01|GH	99.9495	99.9495	99.9495	99.9563	99.9563	99.9798	99.9798	99.9832	99.9832	99.9798	99.9765	99.9765	99.9731	99.9765	99.9765	99.9529	99.9865	99.9832	99.9832	99.9798	99.9798	99.9798	99.9765
hCoV-19/Netherlands/NA_685/2020|EPI_ISL_461120|2020-04-05|GH	99.9495	99.9495	99.9495	99.9563	99.9563	99.9798	99.9798	99.9832	99.9832	99.9798	99.9765	99.9765	99.9731	99.9765	99.9765	99.9529	99.9865	99.9832	99.9832	99.9798	99.9798	99.9798	99.9765	99.9933
hCoV-19/Netherlands/Gelderland_16/2020|EPI_ISL_460652|2020-04-03|GH	99.9428	99.9428	99.9428	99.9495	99.9495	99.9731	99.9731	99.9765	99.9765	99.9731	99.9697	99.9697	99.9664	99.9697	99.9697	99.9462	99.9865	99.9832	99.9832	99.9798	99.9596	99.9596	99.9563	99.9731	99.9731
hCoV-19/Harbin/HRB-26/2020|EPI_ISL_459909|2020-03-02|L	99.9428	99.9428	99.9428	99.9495	99.9495	99.9731	99.9731	99.9765	99.9765	99.9731	99.9697	99.9697	99.9664	99.9697	99.9697	99.9865	99.9731	99.9697	99.9697	99.9664	99.9529	99.9529	99.9495	99.9664	99.9664	99.9596
hCoV-19/mink/Netherlands/NB02_13KS/2020|EPI_ISL_447630|2020-04-29|L	99.9394	99.9394	99.9394	99.9394	99.9394	99.963	99.963	99.9664	99.9664	99.963	99.9596	99.9596	99.9563	99.9596	99.9596	99.963	99.963	99.9596	99.9596	99.9563	99.9428	99.9428	99.9394	99.9563	99.9563	99.9495	99.9765
hCoV-19/mink/Netherlands/NB02_07KS/2020|EPI_ISL_447629|2020-04-29|L	99.9394	99.9394	99.9327	99.9394	99.9394	99.963	99.963	99.9664	99.9664	99.963	99.9596	99.9596	99.9563	99.9596	99.9596	99.963	99.963	99.9596	99.9596	99.9563	99.9428	99.9428	99.9394	99.9563	99.9563	99.9495	99.9765	99.9865
hCoV-19/mink/Netherlands/NB02_16RS/2020|EPI_ISL_447632|2020-04-28|L	99.9226	99.9226	99.9226	99.9226	99.9226	99.9462	99.9462	99.9495	99.9495	99.9462	99.9428	99.9428	99.9394	99.9428	99.9428	99.9461	99.9462	99.9428	99.9428	99.9394	99.926	99.926	99.9226	99.9394	99.9394	99.9327	99.9596	99.9832	99.9697
hCoV-19/Netherlands/Gelderland_34/2020|EPI_ISL_460934|2020-04-12|L	99.9428	99.9428	99.9428	99.9495	99.9495	99.9731	99.9731	99.9765	99.9765	99.9731	99.9697	99.9697	99.9664	99.9697	99.9697	99.9731	99.9731	99.9697	99.9697	99.9664	99.9529	99.9529	99.9495	99.9664	99.9664	99.9596	99.9865	99.9899	99.9899	99.9731
hCoV-19/Netherlands/NoordBrabant_10045/2020|EPI_ISL_454794|2020-04-07|L	99.9428	99.9428	99.9428	99.9495	99.9495	99.9731	99.9731	99.9765	99.9765	99.9731	99.9697	99.9697	99.9664	99.9697	99.9697	99.9731	99.9731	99.9697	99.9697	99.9664	99.9529	99.9529	99.9495	99.9664	99.9664	99.9596	99.9865	99.9899	99.9899	99.9731	100
NC_045512.2_|Severe_acute_respiratory_syndrome_coronavirus_2_isolate_Wuhan-Hu-1_complete_genome	99.9495	99.9495	99.9495	99.9563	99.9563	99.9798	99.9798	99.9832	99.9832	99.9798	99.9765	99.9765	99.9731	99.9765	99.9765	99.9798	99.9798	99.9765	99.9765	99.9731	99.9596	99.9596	99.9563	99.9731	99.9731	99.9664	99.9933	99.9832	99.9832	99.9664	99.9933	99.9933
hCoV-19/cat/France/Env-Ba/2020|EPI_ISL_483063|2020-05-14|GR	99.9394	99.9394	99.9394	99.9462	99.9462	99.9697	99.9697	99.9731	99.9731	99.9697	99.9664	99.9865	99.9832	99.9865	99.9865	99.9428	99.9697	99.9664	99.9664	99.963	99.9495	99.9495	99.9462	99.963	99.963	99.9563	99.9563	99.9462	99.9462	99.9293	99.9563	99.9563	99.963
hCoV-19/cat/France/Env-Di/2020|EPI_ISL_483064|2020-05-14|GR	99.9394	99.9394	99.9394	99.9462	99.9462	99.9697	99.9697	99.9731	99.9731	99.9697	99.9664	99.9865	99.9832	99.9865	99.9865	99.9428	99.9697	99.9664	99.9664	99.963	99.9495	99.9495	99.9462	99.963	99.963	99.9563	99.9563	99.9462	99.9462	99.9293	99.9563	99.9563	99.963	100
hCoV-19/Spain/CT-ISCIII-2012573/2020|EPI_ISL_539540|2020-05-21|GR	99.9462	99.9462	99.9461	99.9529	99.9529	99.9765	99.9765	99.9798	99.9798	99.9765	99.9731	99.9933	99.9899	99.9933	99.9933	99.9495	99.9765	99.9731	99.9731	99.9697	99.9563	99.9563	99.9529	99.9697	99.9697	99.963	99.963	99.9529	99.9529	99.9361	99.963	99.963	99.9697	99.9798	99.9798
hCoV-19/France/CVL8278/2020|EPI_ISL_560574|2020-03-25|GR	99.9394	99.9394	99.9394	99.9462	99.9462	99.9697	99.9697	99.9731	99.9731	99.9697	99.9664	99.9865	99.9832	99.9865	99.9865	99.9428	99.9697	99.9664	99.9664	99.963	99.9529	99.9529	99.9495	99.963	99.963	99.9563	99.9563	99.9462	99.9462	99.9293	99.9563	99.9563	99.963	99.9731	99.9731	99.9798
hCoV-19/France/CVL8280/2020|EPI_ISL_560575|2020-04-07|GR	99.9327	99.9327	99.9327	99.9394	99.9394	99.963	99.963	99.9664	99.9664	99.963	99.9596	99.9798	99.9765	99.9798	99.9798	99.936	99.963	99.9596	99.9596	99.9563	99.9462	99.9462	99.9428	99.9563	99.9563	99.9495	99.9495	99.9394	99.9394	99.9226	99.9495	99.9495	99.9563	99.9664	99.9664	99.9731	99.9933
hCoV-19/France/CVL8294/2020|EPI_ISL_560579|2020-04-07|GR	99.9327	99.9327	99.9327	99.9394	99.9394	99.963	99.963	99.9664	99.9664	99.963	99.9596	99.9798	99.9765	99.9798	99.9798	99.936	99.963	99.9596	99.9596	99.9563	99.9462	99.9462	99.9428	99.9563	99.9563	99.9495	99.9495	99.9394	99.9394	99.9226	99.9495	99.9495	99.9563	99.9664	99.9664	99.9731	99.9933	99.9865
hCoV-19/Belgium/ULG-10223/2020|EPI_ISL_498129|2020-05-15|GR	99.9394	99.9394	99.9394	99.9462	99.9462	99.9697	99.9697	99.9731	99.9731	99.9697	99.9664	99.9865	99.9832	99.9865	99.9865	99.9428	99.9697	99.9664	99.9664	99.963	99.9495	99.9495	99.9462	99.963	99.963	99.9563	99.9563	99.9462	99.9462	99.9293	99.9563	99.9563	99.963	99.9731	99.9731	99.9798	99.9731	99.9664	99.9664
MN996532.2 (Bat coronavirus RaTG13)	96.0282	96.0283	96.0225	96.0323	96.0394	96.0575	96.0575	96.061	96.0611	96.0574	96.0682	96.0537	96.0502	96.0537	96.0534	96.0663	96.061	96.0575	96.0573	96.0539	96.0466	96.0466	96.043	96.0609	96.061	96.0469	96.0647	96.0534	96.0606	96.0428	96.0643	96.0643	96.0718	96.0393	96.0393	96.0466	96.0393	96.0321	96.0322	96.0396
MT121216.1 (Pangolin)	89.2654	89.2656	89.2542	89.2622	89.2701	89.2865	89.2865	89.2904	89.2823	89.278	89.2902	89.2736	89.2696	89.2736	89.2727	89.3003	89.2821	89.2782	89.2778	89.2743	89.2817	89.2817	89.2775	89.2817	89.2821	89.2703	89.3022	89.2804	89.2809	89.2645	89.2932	89.2932	89.3022	89.2571	89.2571	89.2657	89.2615	89.2532	89.2534	89.2657	89.2234
